# Supplementary material for: N^N^C-Cyclometalated rhodium(iii) complexes with isomeric pyrimidine-based ligands: unveiling the impact of isomerism on structural motifs, luminescence and cytotoxicity
Source: Royal Society of Chemistry journal article supplement (doi:10.1039/d4dt00824c), 2024-01-01
Supplement: d4dt00824c1.pdf [file d4dt00824c1.pdf]

*Electronic Supplementary Information*

## **N<sup>N</sup>C-Cyclometalated rhodium(III) complexes with isomeric pyrimidine-based ligands: unveiling the impact of isomerism on structural motifs, luminescence and cytotoxicity**

Sofia N. Vorobyeva<sup>\*a</sup>, Sof'ya A. Bautina<sup>b</sup>, Nikita A. Shekhovtsov<sup>\*a</sup>, Elena B. Nikolaenkova,<sup>c</sup> Taisiya S. Sukhikh,<sup>a</sup> Yuliya A. Golubeva,<sup>a</sup> Lyubov S. Klyushova,<sup>d</sup> Viktor P. Krivopalov,<sup>c</sup> Marianna I. Rakhmanova,<sup>a</sup> Christophe Gourlaouen,<sup>e</sup> Mark B. Bushuev<sup>\*a</sup>

<sup>a</sup>*Nikolaev Institute of Inorganic Chemistry, Siberian Branch of Russian Academy of Sciences, 3, Acad. Lavrentiev Ave., Novosibirsk 630090, Russia. E-mail: vorobyeva@niic.nsc.ru (Sofia N. Vorobyeva), shekhovtsov@niic.nsc.ru (Nikita A. Shekhovtsov), bushuev@niic.nsc.ru (Mark B. Bushuev)*

<sup>b</sup>*Novosibirsk State University, 1, Pirogova str., Novosibirsk 630090, Russia*

<sup>c</sup>*N. N. Vorozhtsov Novosibirsk Institute of Organic Chemistry, Siberian Branch of Russian Academy of Sciences, 3, Acad. Lavrentiev Ave., Novosibirsk 630090, Russia*

<sup>d</sup>*Institute of Molecular Biology and Biophysics, Federal Research Center of Fundamental and Translational Medicine (IMBB FRC FTM), 2/12, Timakova str., 630060, Novosibirsk, Russia*

<sup>e</sup>*Laboratoire de Chimie Quantique, Institut de Chimie, UMR 7177 CNRS-Université de Strasbourg, 4 rue Blaise Pascal, 67070 Strasbourg Cedex, France*

# Table of Contents

|                                                   |    |
|---------------------------------------------------|----|
| <b>NMR data</b> .....                             | 3  |
| Figure S1 .....                                   | 3  |
| Figure S2 .....                                   | 4  |
| Figure S3 .....                                   | 5  |
| Figure S4 .....                                   | 6  |
| <b>IR spectra</b> .....                           | 7  |
| Figure S5 .....                                   | 7  |
| Figure S6 .....                                   | 7  |
| Figure S7 .....                                   | 8  |
| Figure S8 .....                                   | 8  |
| <b>Structural data</b> .....                      | 9  |
| Table S1 .....                                    | 9  |
| Figure S9 .....                                   | 10 |
| Figure S10 .....                                  | 10 |
| Figure S11 .....                                  | 10 |
| Figure S12 .....                                  | 11 |
| Figure S13 .....                                  | 11 |
| Figure S14 .....                                  | 11 |
| Figure S15 .....                                  | 12 |
| Figure S16 .....                                  | 12 |
| Figure S17 .....                                  | 12 |
| Figure S18 .....                                  | 13 |
| Figure S19 .....                                  | 13 |
| Figure S20 .....                                  | 13 |
| Figure S21 .....                                  | 14 |
| Figure S22 .....                                  | 14 |
| Figure S23 .....                                  | 15 |
| Figure S24 .....                                  | 15 |
| <b>Computational and photophysical data</b> ..... | 16 |
| Figure S25 .....                                  | 16 |
| Figure S26 .....                                  | 16 |
| Figure S27 .....                                  | 17 |
| Figure S28 .....                                  | 17 |
| Table S2 .....                                    | 18 |
| Table S3 .....                                    | 23 |
| Table S4 .....                                    | 26 |
| Table S5 .....                                    | 32 |
| Table S6 .....                                    | 35 |
| Table S7 .....                                    | 36 |
| Table S8 .....                                    | 37 |
| Table S9 .....                                    | 38 |
| <b>Cytotoxic activity</b> .....                   | 40 |
| Figure S29 .....                                  | 40 |

# NMR data

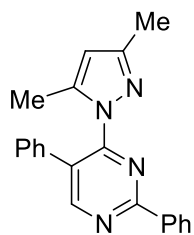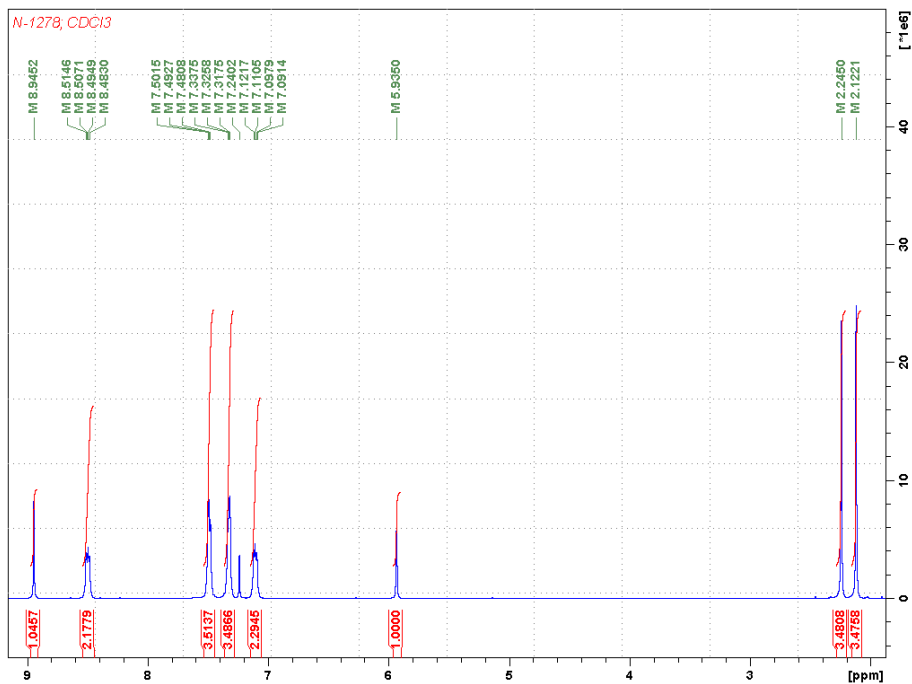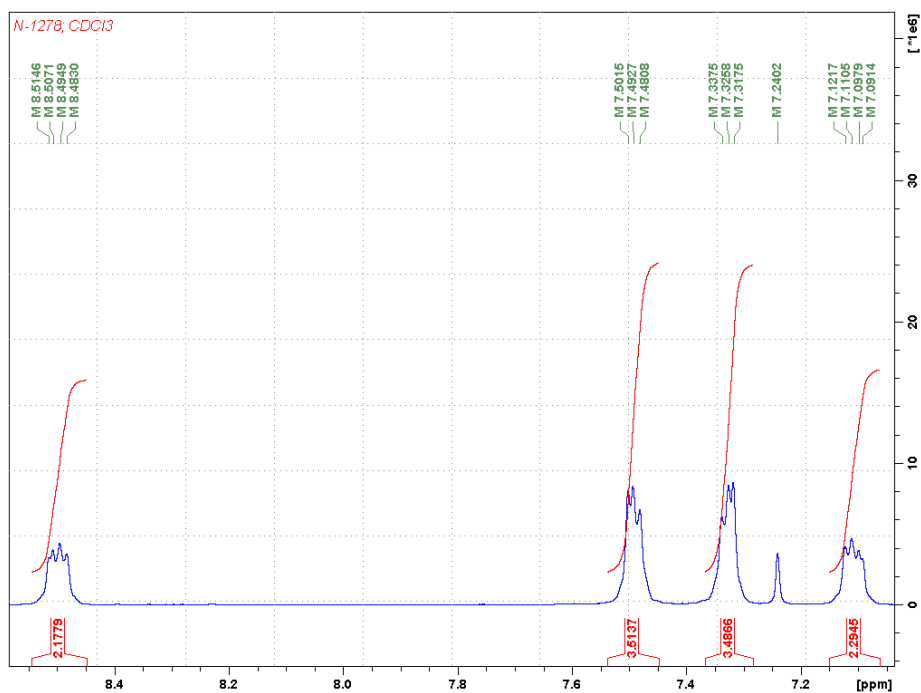

Figure S1. <sup>1</sup>H NMR spectrum of 4-(3,5-dimethyl-1H-pyrazol-1-yl)-2,5-diphenylpyrimidine (**HL**<sup>2,5</sup>).

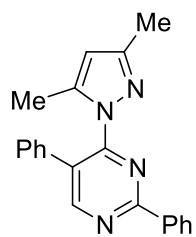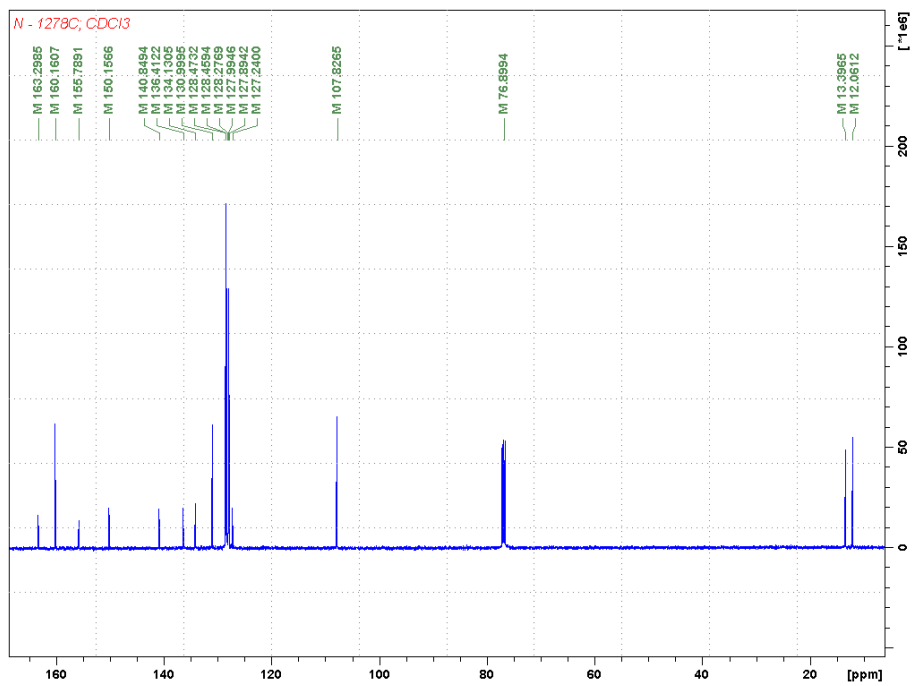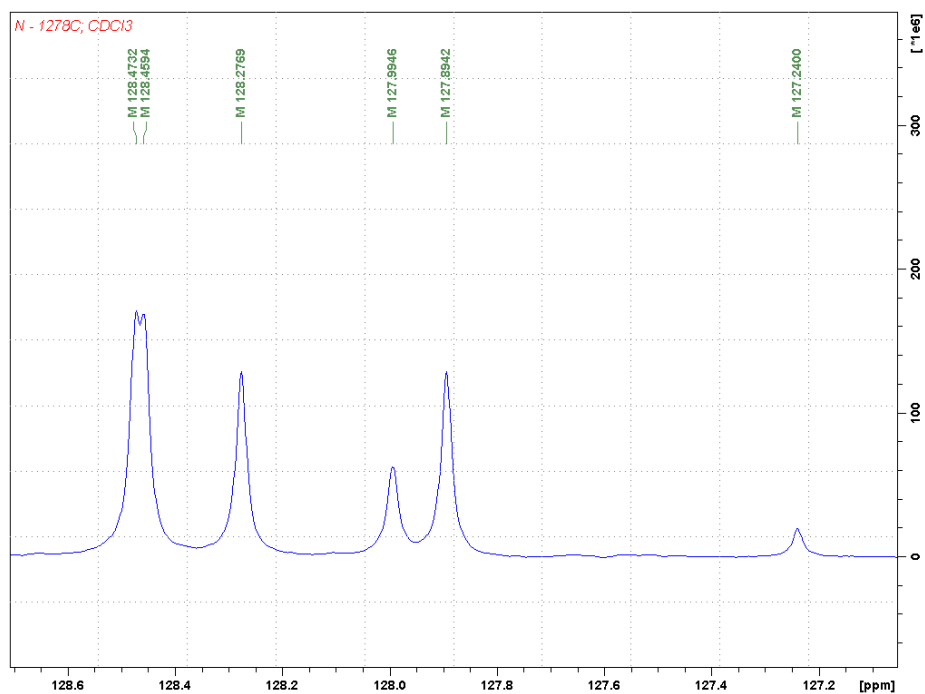

Figure S2. <sup>13</sup>C NMR spectrum of 4-(3,5-dimethyl-1H-pyrazol-1-yl)-2,5-diphenylpyrimidine (HL<sup>2,5</sup>).

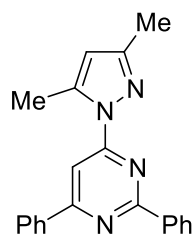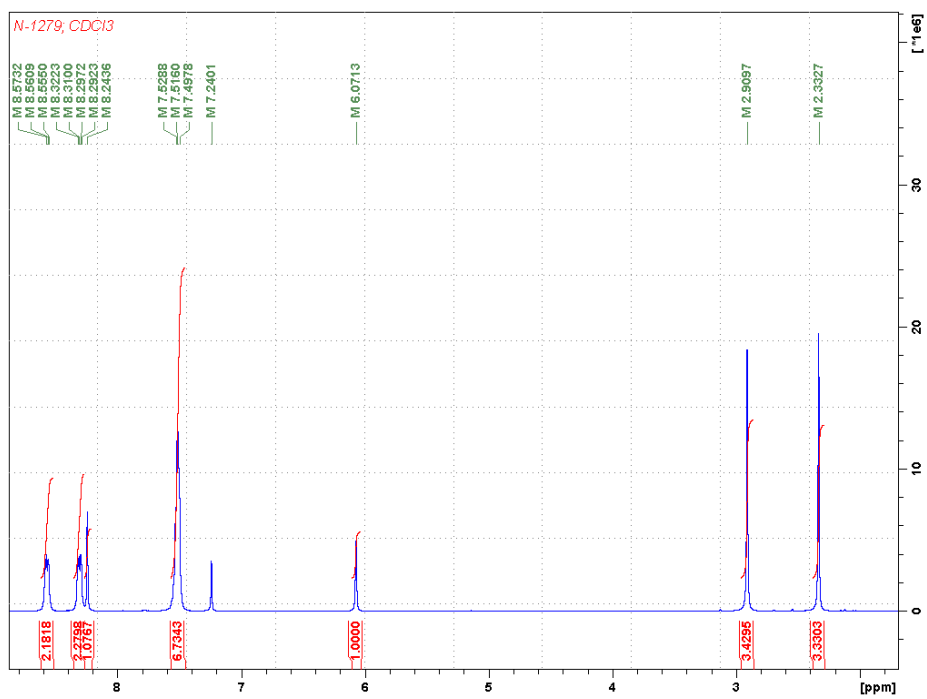

Figure S3. <sup>1</sup>H NMR spectrum of 4-(3,5-dimethyl-1H-pyrazol-1-yl)-2,6-diphenylpyrimidine (**HL**<sup>2,6</sup>).

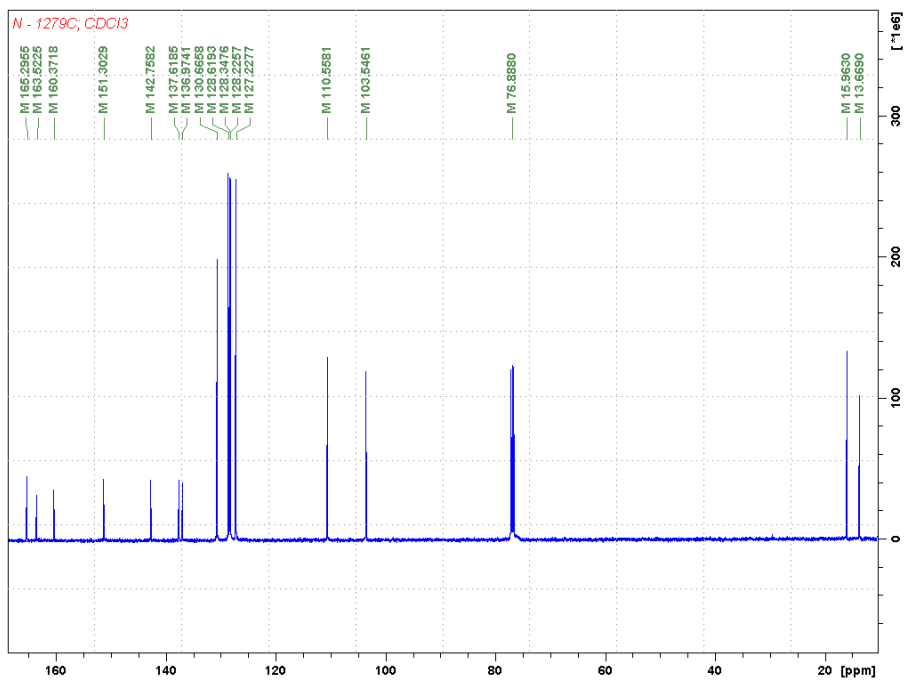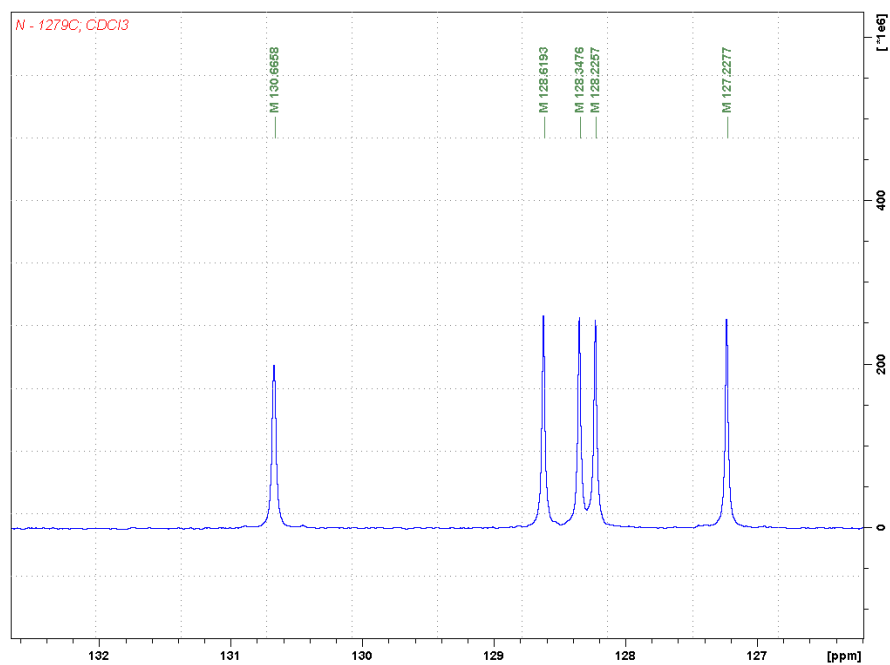

Figure S4. <sup>13</sup>C NMR spectrum of 4-(3,5-dimethyl-1*H*-pyrazol-1-yl)-2,6-diphenylpyrimidine (**HL**<sup>2,6</sup>).

## IR spectra

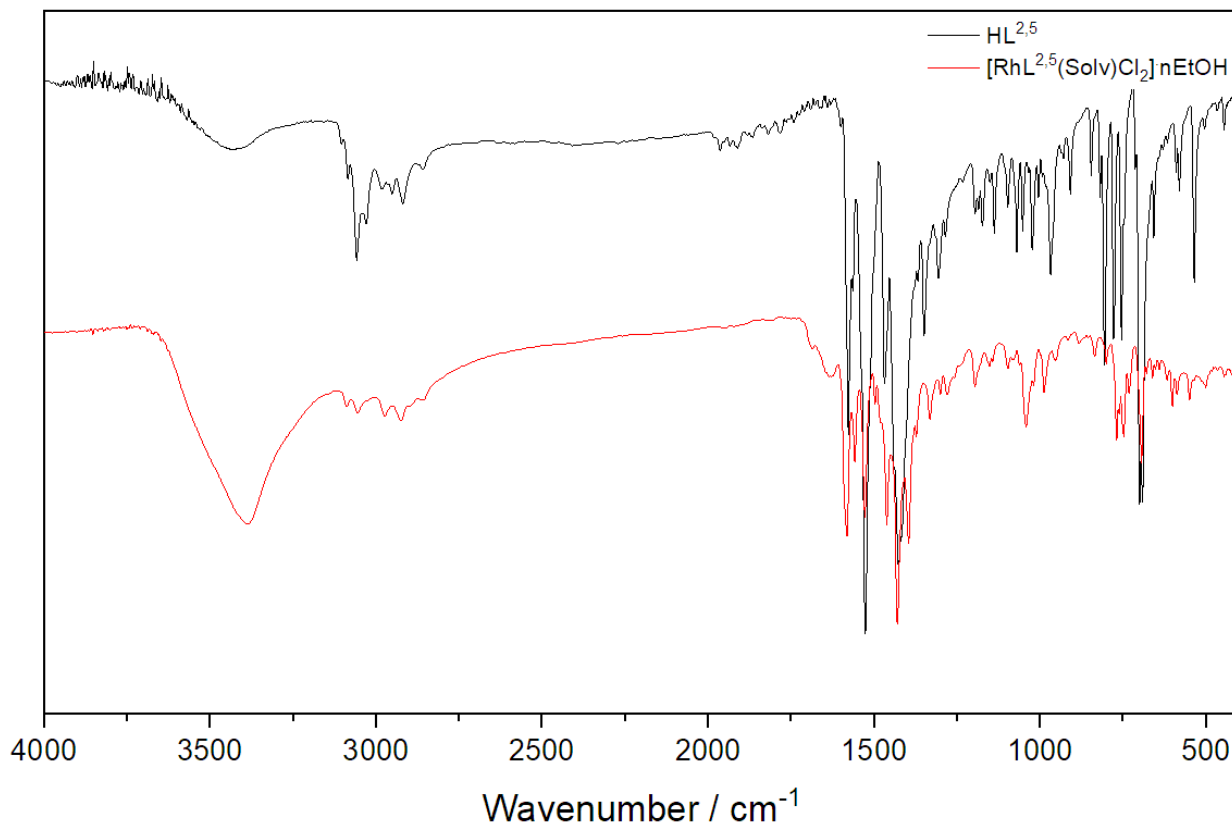

Figure S5. IR spectra of 4-(3,5-dimethyl-1*H*-pyrazol-1-yl)-2,5-diphenylpyrimidine ( $\text{HL}^{2.5}$ ) and  $[\text{RhL}^{2.5}(\text{Solv})\text{Cl}_2] \cdot n\text{EtOH}$ .

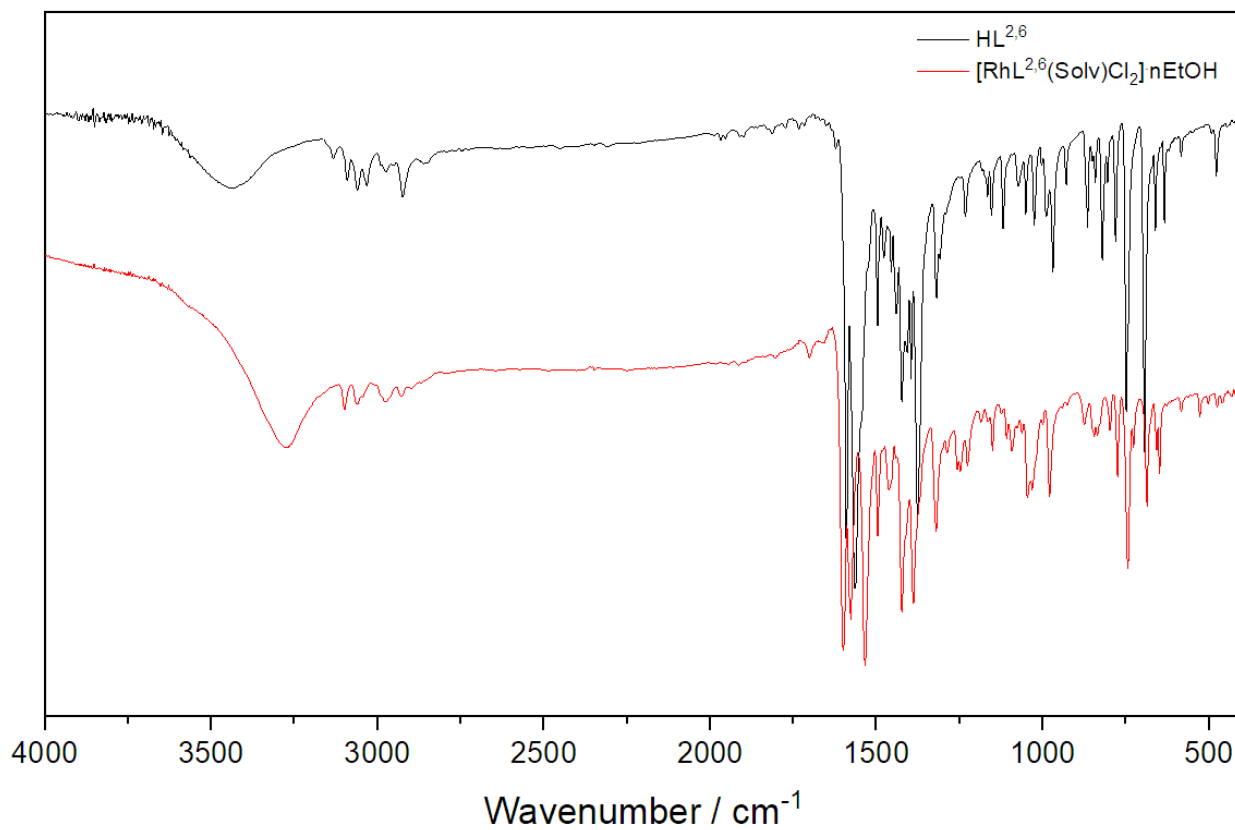

Figure S6. IR spectra of 4-(3,5-dimethyl-1*H*-pyrazol-1-yl)-2,6-diphenylpyrimidine ( $\text{HL}^{2.6}$ ) and  $[\text{RhL}^{2.6}(\text{Solv})\text{Cl}_2] \cdot n\text{EtOH}$ .

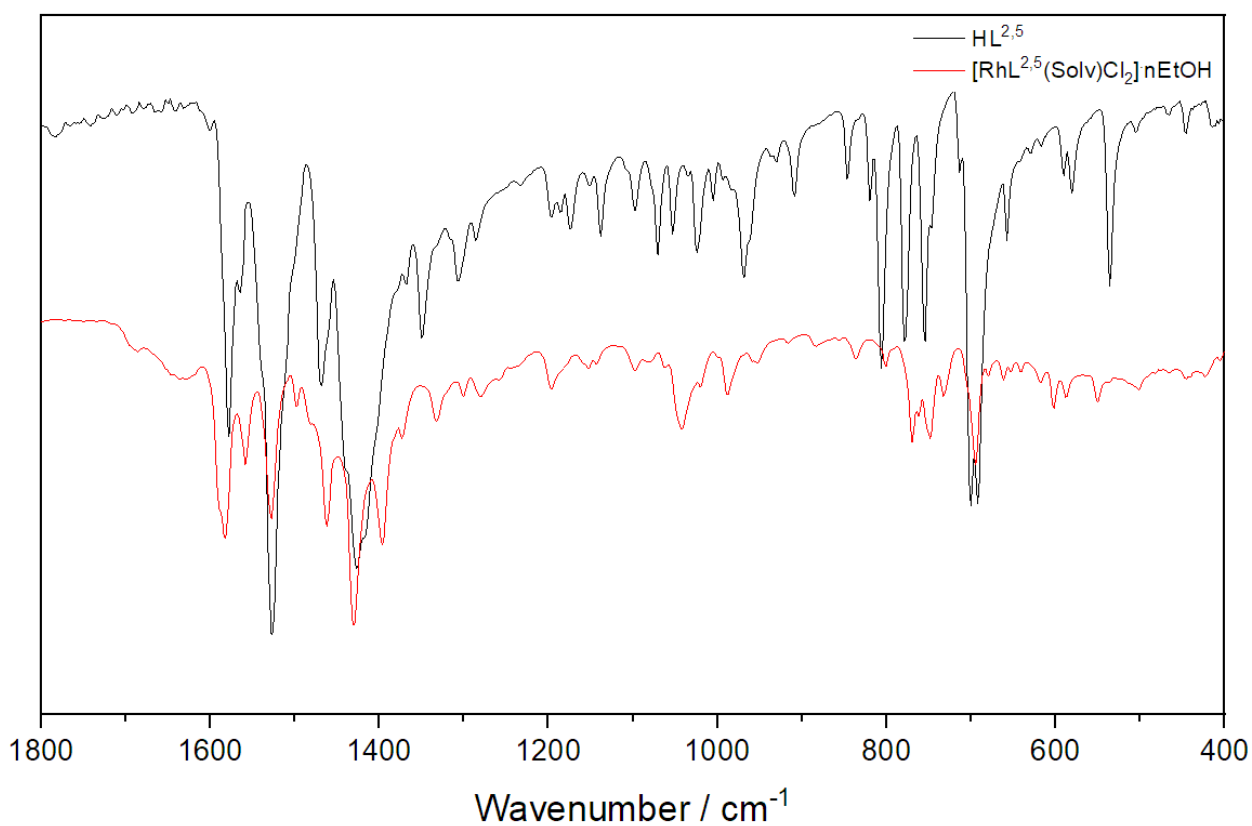

Figure S7. Comparison of IR spectra of 4-(3,5-dimethyl-1*H*-pyrazol-1-yl)-2,5-diphenylpyrimidine (HL<sup>2.5</sup>) and [RhL<sup>2.5</sup>(Solv)Cl<sub>2</sub>]·nEtOH in the 1800 – 400 cm<sup>-1</sup> range.

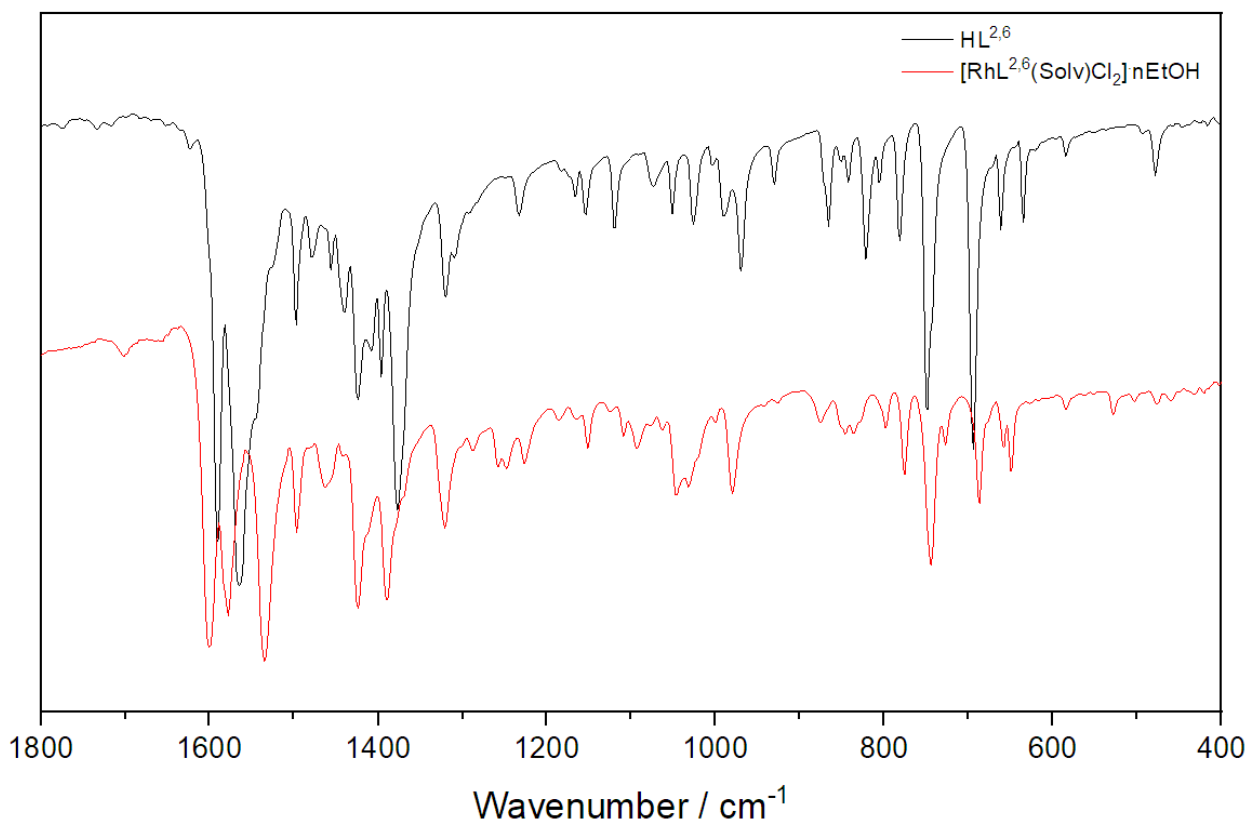

Figure S8. Comparison of IR spectra of 4-(3,5-dimethyl-1*H*-pyrazol-1-yl)-2,6-diphenylpyrimidine (HL<sup>2.6</sup>) and [RhL<sup>2.6</sup>(Solv)Cl<sub>2</sub>]·nEtOH in the 1800 – 400 cm<sup>-1</sup> range.



## Structural data

Table S1. Crystal data and structure refinement for **HL<sup>2,5</sup>**, **HL<sup>2,6</sup>**, **[RhL<sup>2,5</sup>(Solv)Cl<sub>2</sub>] $\cdot$ nEtOH**, and **[RhL<sup>2,6</sup>(Solv)Cl<sub>2</sub>] $\cdot$ nEtOH**.

|                                                 | <b>HL<sup>2,5</sup></b>                           | <b>HL<sup>2,6</sup></b>                           | <b>[RhL<sup>2,5</sup>(Solv)Cl<sub>2</sub>]<math>\cdot</math>nEtOH</b>                | <b>[RhL<sup>2,6</sup>(Solv)Cl<sub>2</sub>]<math>\cdot</math>nEtOH</b>                |
|-------------------------------------------------|---------------------------------------------------|---------------------------------------------------|--------------------------------------------------------------------------------------|--------------------------------------------------------------------------------------|
| Empirical formula                               | C <sub>21</sub> H <sub>18</sub> N <sub>4</sub>    | C <sub>21</sub> H <sub>18</sub> N <sub>4</sub>    | C <sub>23</sub> H <sub>24.4</sub> Cl <sub>2</sub> N <sub>4</sub> O <sub>1.7</sub> Rh | C <sub>23</sub> H <sub>23.8</sub> Cl <sub>2</sub> N <sub>4</sub> O <sub>1.4</sub> Rh |
| Formula weight                                  | 326.39                                            | 326.39                                            | 557.87                                                                               | 552.47                                                                               |
| Crystal system                                  | monoclinic                                        | orthorhombic                                      | triclinic                                                                            | triclinic                                                                            |
| Space group, Z                                  | P2 <sub>1</sub> /n, 8                             | P2 <sub>1</sub> 2 <sub>1</sub> 2 <sub>1</sub> , 4 | P-1, 2                                                                               | P-1, 2                                                                               |
| a(Å)                                            | 17.1096(3)                                        | 5.0408(4)                                         | 8.8156(3)                                                                            | 8.7080(3)                                                                            |
| b(Å)                                            | 7.69100(10)                                       | 16.6643(13)                                       | 10.9113(4)                                                                           | 9.5487(4)                                                                            |
| c(Å)                                            | 26.8277(6)                                        | 19.8837(18)                                       | 12.2108(5)                                                                           | 14.4311(6)                                                                           |
| $\alpha$ /°                                     | 90                                                | 90                                                | 103.5000(10)                                                                         | 84.660(2)                                                                            |
| $\beta$ /°                                      | 104.2630(10)                                      | 90                                                | 92.4590(10)                                                                          | 80.9050(10)                                                                          |
| $\gamma$ /°                                     | 90                                                | 90                                                | 91.6840(10)                                                                          | 79.224(2)                                                                            |
| V(Å <sup>3</sup> )                              | 3421.44(11)                                       | 1670.3(2)                                         | 1140.11(7)                                                                           | 1161.47(8)                                                                           |
| dCalc(g/cm <sup>3</sup> )                       | 1.267                                             | 1.298                                             | 1.618                                                                                | 1.575                                                                                |
| $\mu$ /mm <sup>-1</sup>                         | 0.077                                             | 0.079                                             | 1.010                                                                                | 0.990                                                                                |
| F(000)                                          | 1376.0                                            | 688.0                                             | 561.0                                                                                | 557.0                                                                                |
| Crystal size (mm)                               | 0.180 × 0.180 × 0.100                             | 0.270 × 0.050 × 0.010                             | 0.140 × 0.070 × 0.030                                                                | 0.120 × 0.060 × 0.040                                                                |
| 2 $\theta$ range for data collection/°          | 3.472 - 66.302                                    | 3.188 - 52.742                                    | 4.512 - 61.116                                                                       | 4.812 to 61.368                                                                      |
| Index ranges                                    | -26 ≤ h ≤ 25<br>-11 ≤ k ≤ 11<br>-23 ≤ l ≤ 41      | -5 ≤ h ≤ 6<br>-18 ≤ k ≤ 20<br>-24 ≤ l ≤ 24        | -10 ≤ h ≤ 12<br>-15 ≤ k ≤ 14<br>-17 ≤ l ≤ 17                                         | -12 ≤ h ≤ 12<br>-13 ≤ k ≤ 13<br>-20 ≤ l ≤ 20                                         |
| Reflections collected                           | 48966                                             | 7858                                              | 14266                                                                                | 23075                                                                                |
| Independent reflections (R <sub>int</sub> )     | 13029 [R <sub>int</sub> = 0.0622]                 | 3400 [R <sub>int</sub> = 0.0460]                  | 6959 [R <sub>int</sub> = 0.0295]                                                     | 7138 [R <sub>int</sub> = 0.0433]                                                     |
| Completeness to theta = 50.5°                   | 100 %                                             | 100 %                                             | 99.8 %                                                                               | 99.9 %                                                                               |
| Data / restraints / parameters                  | 13029/0/455                                       | 3400/0/228                                        | 6959/1/317                                                                           | 7138/6/297                                                                           |
| Goodness-of-fit on F <sup>2</sup>               | 1.023                                             | 1.044                                             | 1.068                                                                                | 1.047                                                                                |
| Final R indices (I ≥ 2 $\sigma$ (I))            | R <sub>1</sub> = 0.0627, wR <sub>2</sub> = 0.1362 | R <sub>1</sub> = 0.0543, wR <sub>2</sub> = 0.1025 | R <sub>1</sub> = 0.0363, wR <sub>2</sub> = 0.0785                                    | R <sub>1</sub> = 0.0390, wR <sub>2</sub> = 0.0857                                    |
| R indices (all data)                            | R <sub>1</sub> = 0.1161, wR <sub>2</sub> = 0.1658 | R <sub>1</sub> = 0.0881, wR <sub>2</sub> = 0.1159 | R <sub>1</sub> = 0.0483, wR <sub>2</sub> = 0.0834                                    | R <sub>1</sub> = 0.0532, wR <sub>2</sub> = 0.0917                                    |
| Largest diff. peak and hole (e/Å <sup>3</sup> ) | 0.32/-0.24                                        | 0.18/-0.21                                        | 0.78/-0.57                                                                           | 0.69/-0.53                                                                           |

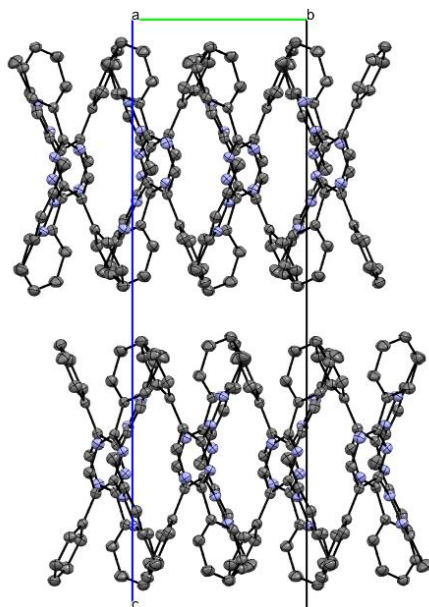

Figure S9. Packing of **HL<sup>2.5</sup>** (view along the *a* axis, two supramolecular layers are shown). Hydrogen atoms are omitted for clarity.

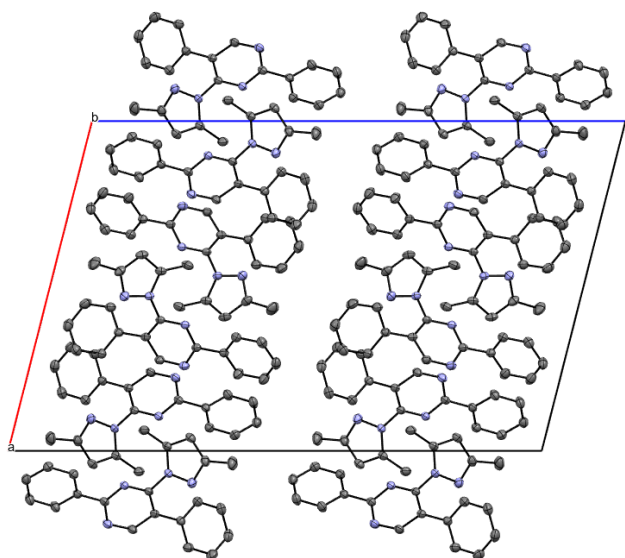

Figure S10. Packing of **HL<sup>2.5</sup>** (view along the *b* axis, two supramolecular layers are shown). Hydrogen atoms are omitted for clarity.

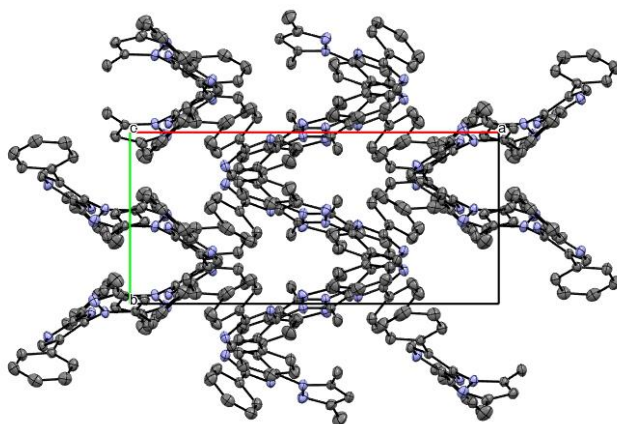

Figure S11. Packing of **HL<sup>2.5</sup>** (view along the *c* axis). Hydrogen atoms are omitted for clarity.

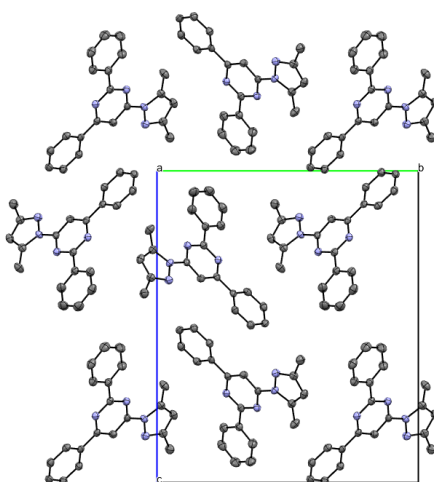

Figure S12. Packing of **HL<sup>2.6</sup>** (view along the *a* axis). Hydrogen atoms are omitted for clarity.

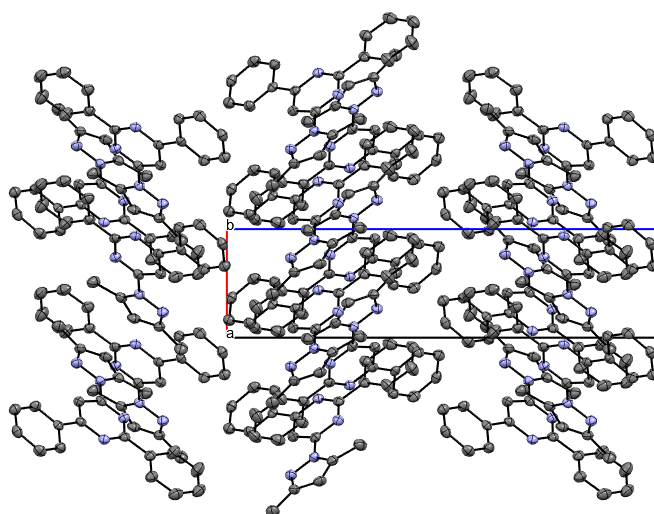

Figure S13. Packing of **HL<sup>2.6</sup>** (view along the *b* axis). Hydrogen atoms are omitted for clarity.

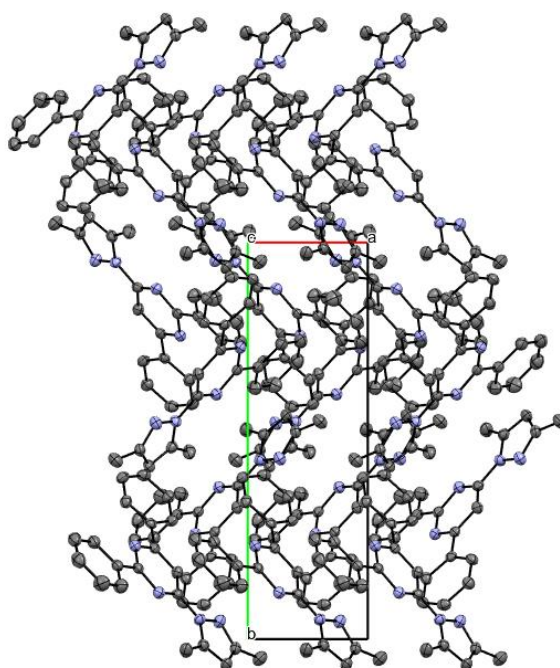

Figure S14. Packing of **HL<sup>2.6</sup>** (view along the *c* axis). Hydrogen atoms are omitted for clarity.

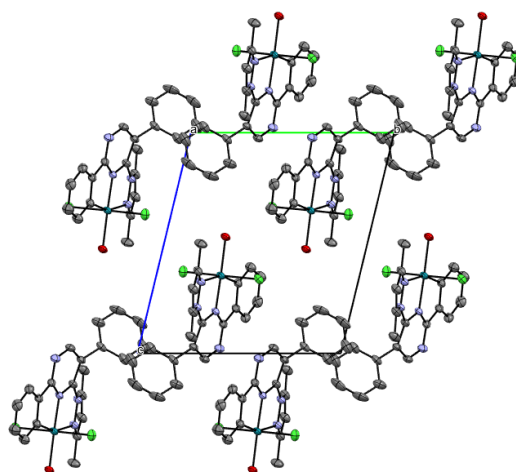

Figure S15. Packing of  $[\text{RhL}^{2.5}(\text{Solv})\text{Cl}_2] \cdot n\text{EtOH}$  (view along the  $a$  axis). Hydrogen atoms and EtOH molecules are omitted for clarity.

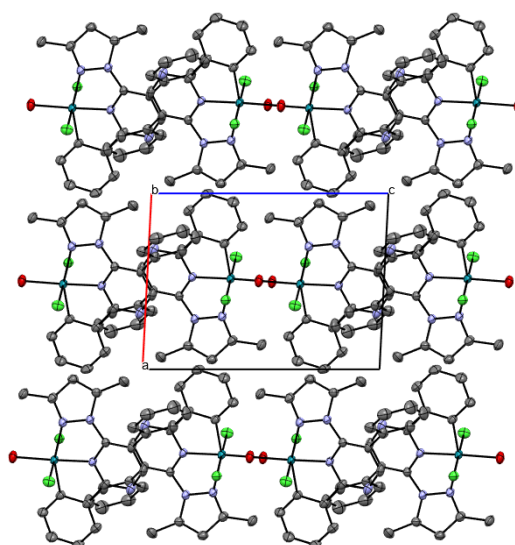

Figure S16. Packing of  $[\text{RhL}^{2.5}(\text{Solv})\text{Cl}_2] \cdot n\text{EtOH}$  (view along the  $b$  axis). Hydrogen atoms and EtOH molecules are omitted for clarity.

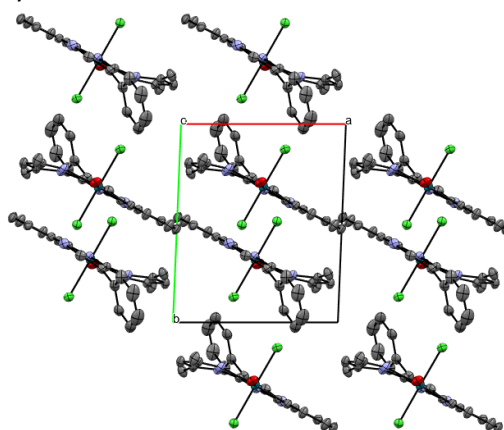

Figure S17. Packing of  $[\text{RhL}^{2.5}(\text{Solv})\text{Cl}_2] \cdot n\text{EtOH}$  (view along the  $c$  axis). Hydrogen atoms and EtOH molecules are omitted for clarity.

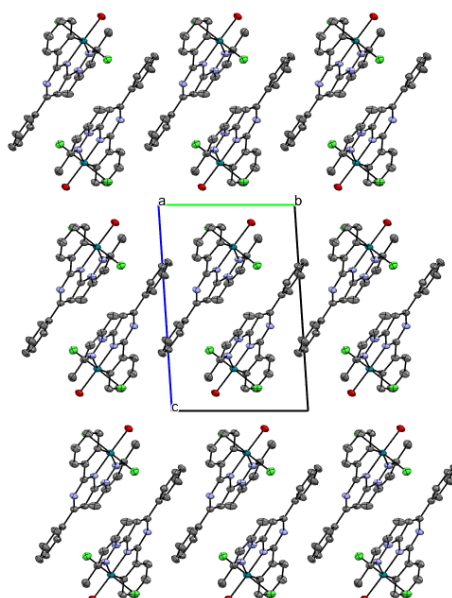

Figure S18. Packing of  $[\text{RhL}^{2,6}(\text{Solv})\text{Cl}_2] \cdot n\text{EtOH}$  (view along the  $a$  axis). Hydrogen atoms and EtOH molecules are omitted for clarity.

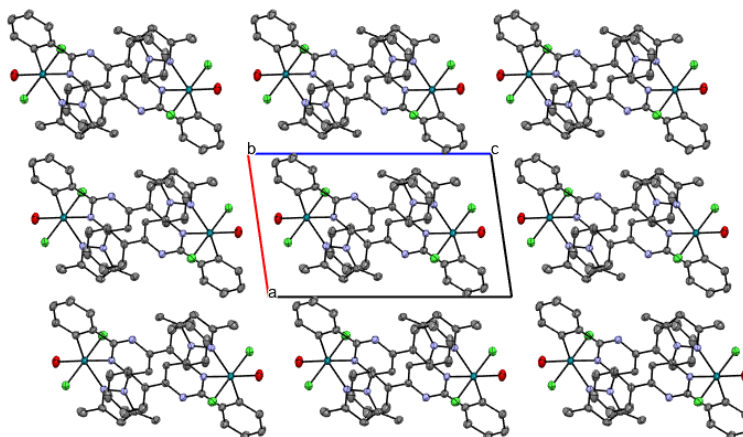

Figure S19. Packing of  $[\text{RhL}^{2,6}(\text{Solv})\text{Cl}_2] \cdot n\text{EtOH}$  (view along the  $b$  axis). Hydrogen atoms and EtOH molecules are omitted for clarity.

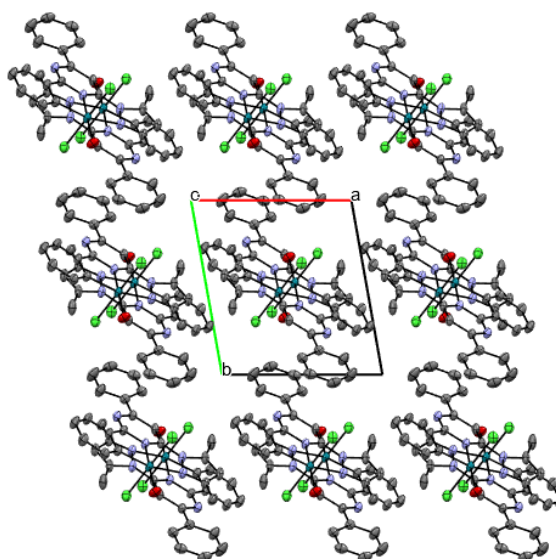

Figure S20. Packing of  $[\text{RhL}^{2,6}(\text{Solv})\text{Cl}_2] \cdot n\text{EtOH}$  (view along the  $c$  axis). Hydrogen atoms and EtOH molecules are omitted for clarity.

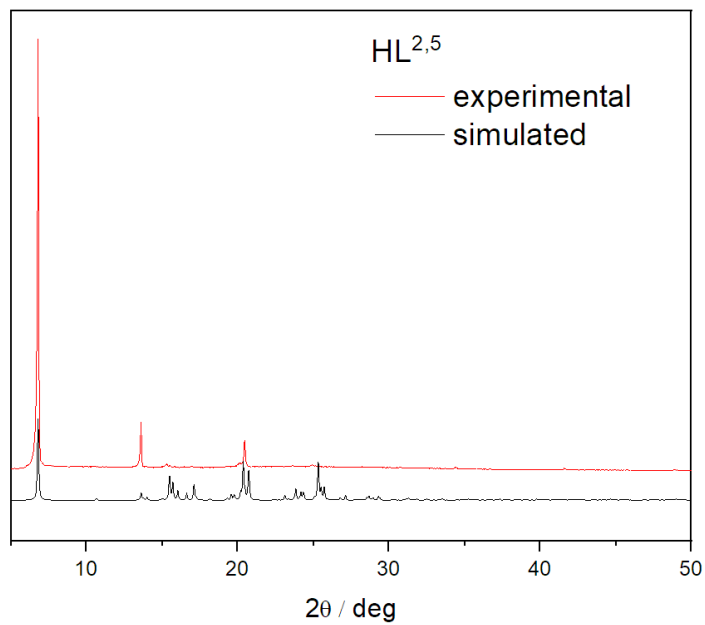

Figure S21. X-ray powder diffraction patterns of **HL<sup>2,5</sup>**.

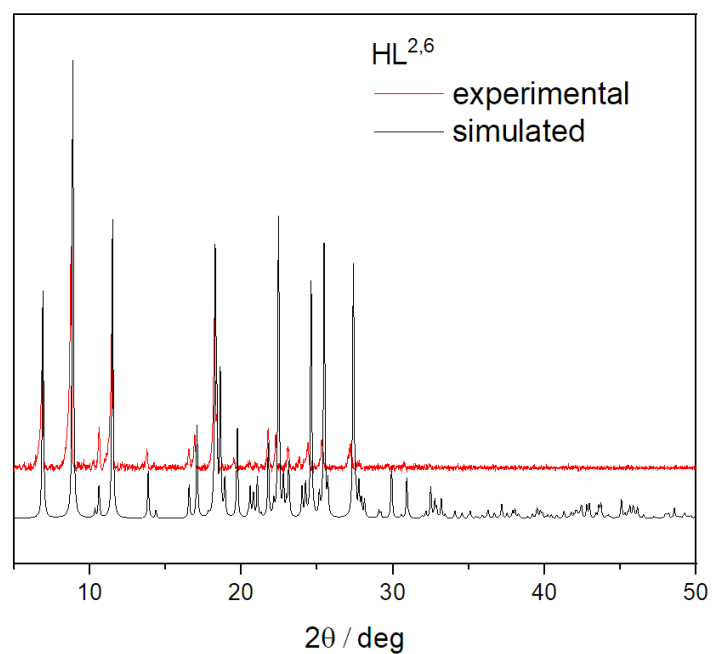

Figure S22. X-ray powder diffraction patterns of **HL<sup>2,6</sup>**.

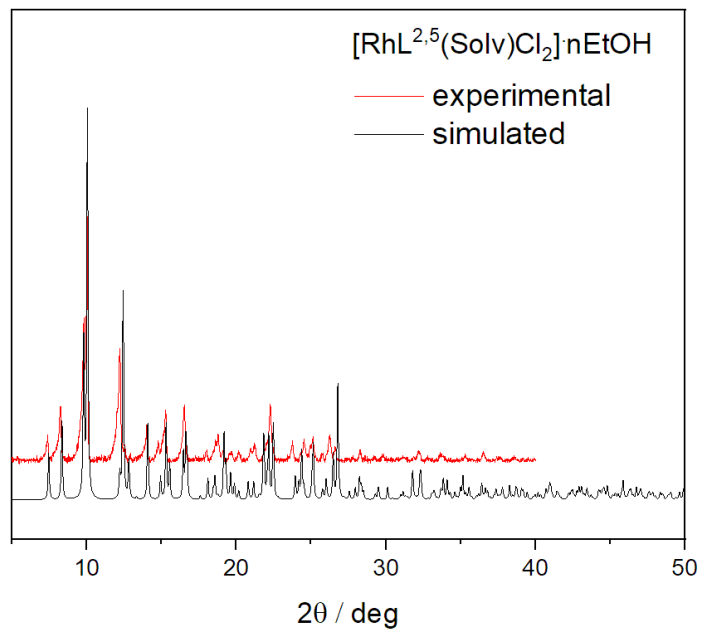

Figure S23. X-ray powder diffraction patterns of [RhL<sup>2,5</sup>(Solv)Cl<sub>2</sub>]*n*EtOH.

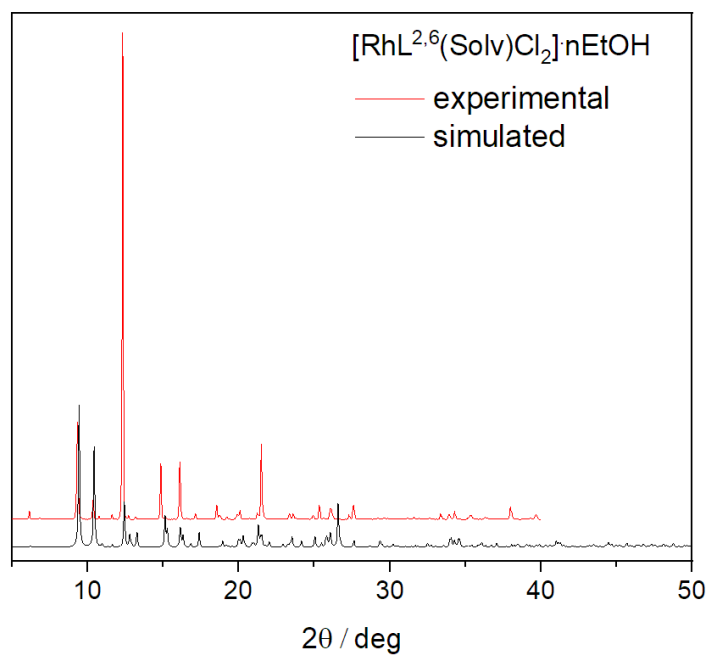

Figure S24. X-ray powder diffraction patterns of [RhL<sup>2,6</sup>(Solv)Cl<sub>2</sub>]*n*EtOH.

## Computational and photophysical data

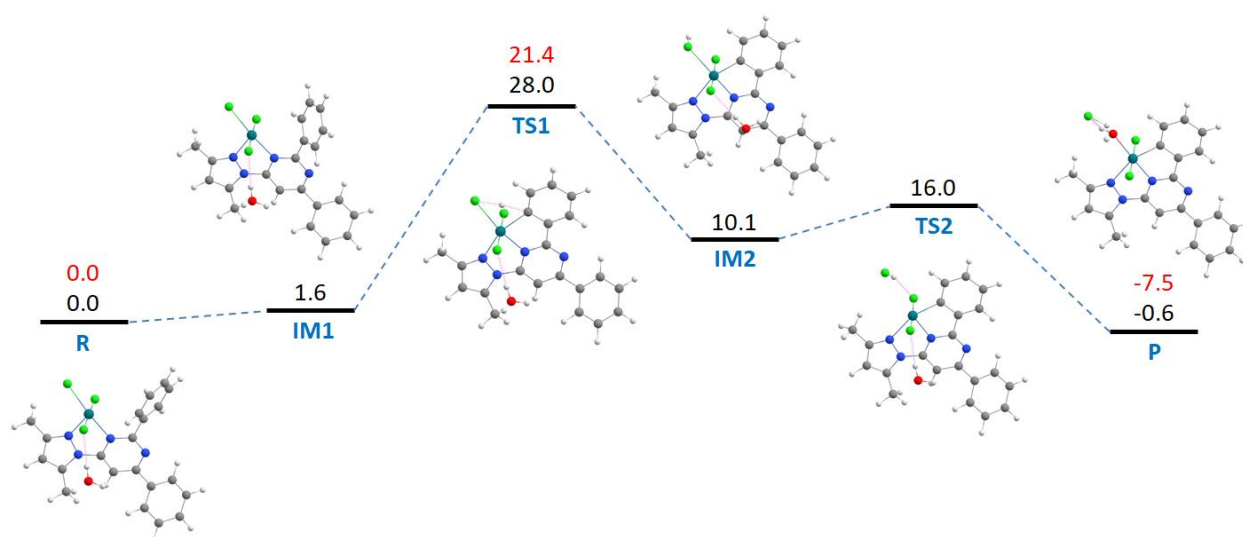

Figure S25. The computed C–H bond activation path for the rhodium(III) complex with **HL<sup>2,6</sup>**. Relative energies calculated in PCM (EtOH) and in the gas phase are shown in black and red, respectively.

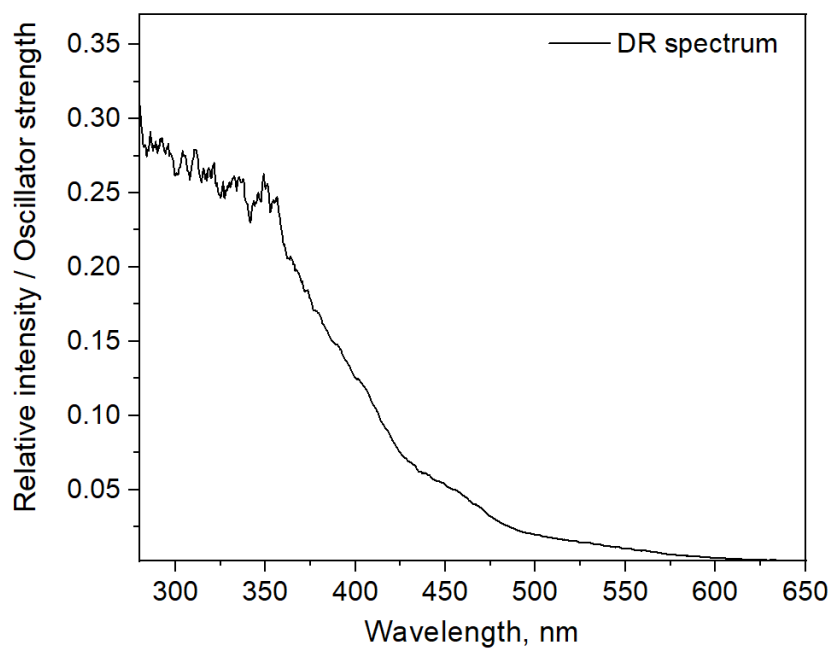

Figure S26. Experimental diffuse reflectance (DR) spectrum of the **[RhL<sup>2,6</sup>(Solv)Cl<sub>2</sub>] $\cdot$ nEtOH** complex.



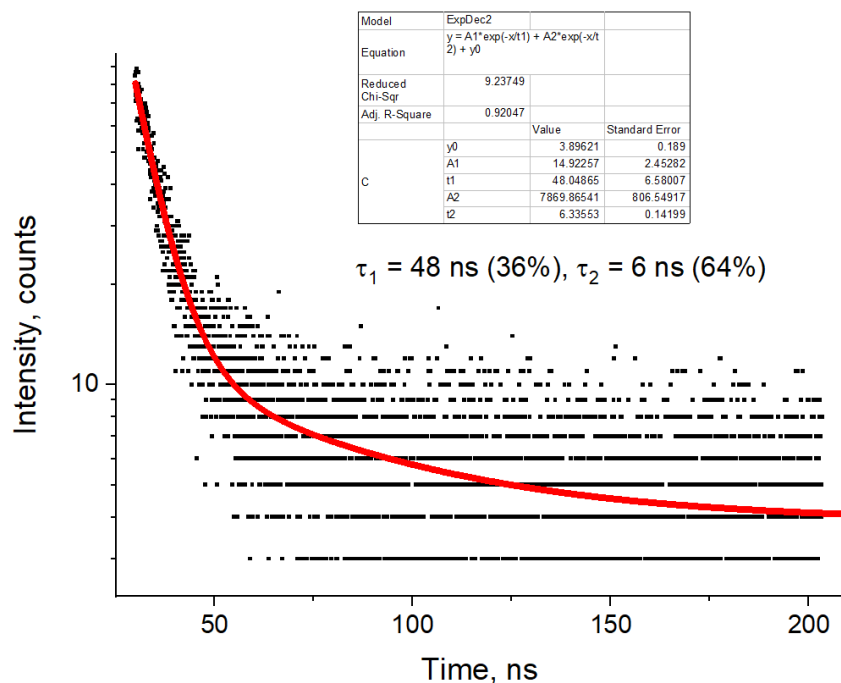

Figure S27. Luminescence decay kinetics of the  $[\text{RhL}^{2.5}(\text{Solv})\text{Cl}_2] \cdot n\text{EtOH}$  complex,  $\lambda_{\text{ex}} = 390 \text{ nm}$ ,  $\lambda_{\text{reg}} = 450 \text{ nm}$

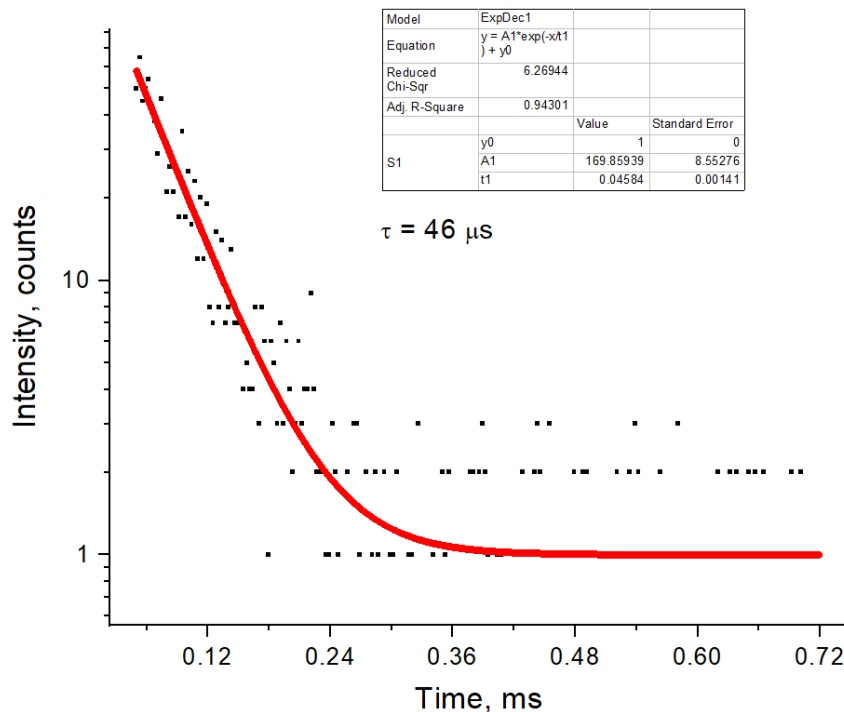

Figure S28. Luminescence decay kinetics of the  $[\text{RhL}^{2.5}(\text{Solv})\text{Cl}_2] \cdot n\text{EtOH}$  complex,  $\lambda_{\text{ex}} = 440 \text{ nm}$ ,  $\lambda_{\text{reg}} = 520 \text{ nm}$

Table S2. Optimized geometries of the ground state of rhodium(III) complexes with **HL<sup>2,5</sup>** from Figure 4 in Cartesian (XYZ) coordinates as calculated in Gaussian at the  $\omega$ B97XD/Stuttgart RSC 1997/6-31+g(d) level of theory in **EtOH continuum solvation model**.

| <b>R</b> |                 |                 |                 |
|----------|-----------------|-----------------|-----------------|
| Rh       | 1.476454000000  | 0.907738000000  | 0.002376000000  |
| Cl       | 1.880220000000  | 0.958925000000  | -2.315005000000 |
| O        | -0.953631000000 | -1.735861000000 | 2.624223000000  |
| N        | 0.190515000000  | -0.663306000000 | -0.308054000000 |
| N        | -0.208825000000 | 1.856846000000  | -0.267996000000 |
| C        | -2.108022000000 | -1.281330000000 | -0.323204000000 |
| N        | -1.281739000000 | 1.060157000000  | -0.598589000000 |
| H        | 4.536030000000  | -2.383453000000 | 2.013331000000  |
| C        | 2.616947000000  | -2.876713000000 | -1.319281000000 |
| C        | 1.970368000000  | -2.323654000000 | -0.210134000000 |
| C        | -1.638423000000 | -2.595250000000 | -0.415483000000 |
| C        | -0.519609000000 | 3.114724000000  | -0.556374000000 |
| N        | -0.355095000000 | -2.937076000000 | -0.465592000000 |
| C        | -1.106572000000 | -0.316531000000 | -0.418068000000 |
| C        | 3.959234000000  | -3.232473000000 | -1.229536000000 |
| C        | 2.660684000000  | -2.152694000000 | 0.993202000000  |
| C        | -1.811702000000 | 3.130640000000  | -1.112693000000 |
| C        | -2.263086000000 | 1.835015000000  | -1.176080000000 |
| C        | 4.653528000000  | -3.052004000000 | -0.032198000000 |
| C        | 0.533864000000  | -1.960543000000 | -0.321796000000 |
| C        | 4.003428000000  | -2.517501000000 | 1.077659000000  |
| Cl       | 1.037693000000  | 0.814693000000  | 2.336300000000  |
| H        | -0.364350000000 | -0.965206000000 | 2.640169000000  |
| H        | -0.439998000000 | -2.455049000000 | 3.003827000000  |
| H        | 4.462976000000  | -3.650828000000 | -2.094676000000 |
| H        | 5.700559000000  | -3.329577000000 | 0.034938000000  |
| H        | -2.333840000000 | 4.001846000000  | -1.477307000000 |
| H        | 2.074126000000  | -3.015316000000 | -2.248940000000 |
| C        | -3.501648000000 | 1.347188000000  | -1.843405000000 |
| H        | -4.319297000000 | 1.200088000000  | -1.135180000000 |
| H        | -3.804840000000 | 2.106217000000  | -2.565785000000 |
| H        | -3.328505000000 | 0.410898000000  | -2.376245000000 |
| C        | 0.401684000000  | 4.261327000000  | -0.347126000000 |
| H        | 1.215313000000  | 4.227420000000  | -1.076371000000 |
| H        | -0.147521000000 | 5.195207000000  | -0.468379000000 |
| H        | 0.848141000000  | 4.222568000000  | 0.647952000000  |
| H        | -2.356298000000 | -3.410802000000 | -0.417399000000 |
| C        | -3.529553000000 | -1.026440000000 | -0.004452000000 |
| C        | -3.847721000000 | -0.199077000000 | 1.078475000000  |
| C        | -4.551365000000 | -1.652317000000 | -0.724119000000 |
| C        | -5.179544000000 | 0.024668000000  | 1.415192000000  |
| C        | -5.882070000000 | -1.427185000000 | -0.383077000000 |
| C        | -6.198519000000 | -0.584545000000 | 0.682439000000  |
| H        | -3.054421000000 | 0.265221000000  | 1.656913000000  |
| H        | -4.308344000000 | -2.289098000000 | -1.569741000000 |
| H        | -5.421251000000 | 0.671826000000  | 2.251892000000  |
| H        | -6.671922000000 | -1.904710000000 | -0.953516000000 |

|            |                 |                 |                 |
|------------|-----------------|-----------------|-----------------|
| H          | -7.236782000000 | -0.405608000000 | 0.942245000000  |
| H          | 2.155963000000  | -1.731883000000 | 1.856640000000  |
| Cl         | 3.150489000000  | 2.500054000000  | 0.393743000000  |
| <b>IM1</b> |                 |                 |                 |
| Rh         | -1.375248000000 | -0.653503000000 | 0.353622000000  |
| Cl         | -1.988720000000 | -0.964071000000 | -1.894670000000 |
| O          | 2.112958000000  | -1.915800000000 | 2.607104000000  |
| N          | -0.107700000000 | 0.813939000000  | -0.198762000000 |
| N          | 0.269346000000  | -1.690561000000 | 0.047218000000  |
| C          | 2.175881000000  | 1.443256000000  | -0.277011000000 |
| N          | 1.347481000000  | -0.927853000000 | -0.359204000000 |
| H          | -4.878593000000 | 1.150947000000  | 0.881110000000  |
| C          | -2.438031000000 | 3.303514000000  | -1.233895000000 |
| C          | -1.936464000000 | 2.360982000000  | -0.335996000000 |
| C          | 1.681578000000  | 2.747808000000  | -0.422100000000 |
| C          | 0.551419000000  | -2.963359000000 | -0.195827000000 |
| N          | 0.394256000000  | 3.076858000000  | -0.494696000000 |
| C          | 1.185070000000  | 0.459819000000  | -0.288200000000 |
| C          | -3.815058000000 | 3.457176000000  | -1.381023000000 |
| C          | -2.828686000000 | 1.597397000000  | 0.434796000000  |
| C          | 1.821289000000  | -3.029256000000 | -0.797884000000 |
| C          | 2.293911000000  | -1.747622000000 | -0.932418000000 |
| C          | -4.698075000000 | 2.674631000000  | -0.637526000000 |
| C          | -0.482620000000 | 2.095692000000  | -0.317845000000 |
| C          | -4.203629000000 | 1.747613000000  | 0.277602000000  |
| Cl         | -0.703664000000 | -0.272629000000 | 2.611260000000  |
| H          | 1.235841000000  | -1.504194000000 | 2.655504000000  |
| H          | 2.407122000000  | -1.987913000000 | 3.520022000000  |
| H          | -4.198234000000 | 4.182960000000  | -2.090440000000 |
| H          | -5.768503000000 | 2.793928000000  | -0.765610000000 |
| H          | 2.316030000000  | -3.925273000000 | -1.139838000000 |
| H          | -1.751400000000 | 3.891415000000  | -1.833336000000 |
| Cl         | -3.003064000000 | -2.190953000000 | 1.083570000000  |
| C          | 3.516868000000  | -1.310355000000 | -1.660746000000 |
| H          | 4.355651000000  | -1.135574000000 | -0.984237000000 |
| H          | 3.791194000000  | -2.108412000000 | -2.351779000000 |
| H          | 3.338510000000  | -0.399713000000 | -2.235127000000 |
| C          | -0.376062000000 | -4.081733000000 | 0.114332000000  |
| H          | -1.308678000000 | -3.971011000000 | -0.443667000000 |
| H          | 0.096162000000  | -5.028586000000 | -0.147759000000 |
| H          | -0.625707000000 | -4.084087000000 | 1.177912000000  |
| H          | -2.475509000000 | 0.996726000000  | 1.282260000000  |
| H          | 2.389896000000  | 3.570894000000  | -0.457375000000 |
| C          | 3.614430000000  | 1.223933000000  | -0.007331000000 |
| C          | 3.998380000000  | 0.423615000000  | 1.075196000000  |
| C          | 4.588287000000  | 1.853539000000  | -0.788588000000 |
| C          | 5.349858000000  | 0.245001000000  | 1.357842000000  |
| C          | 5.937966000000  | 1.668427000000  | -0.502171000000 |
| C          | 6.321102000000  | 0.862892000000  | 0.570050000000  |
| H          | 3.250603000000  | -0.084478000000 | 1.680134000000  |
| H          | 4.294085000000  | 2.463315000000  | -1.637941000000 |
| H          | 5.643318000000  | -0.382521000000 | 2.193234000000  |
| H          | 6.689421000000  | 2.147937000000  | -1.120824000000 |

|            |                 |                 |                 |
|------------|-----------------|-----------------|-----------------|
| H          | 7.373786000000  | 0.715168000000  | 0.788527000000  |
| <b>TS1</b> |                 |                 |                 |
| Rh         | -1.533602000000 | -0.499505000000 | 0.168429000000  |
| Cl         | -1.781120000000 | -1.026622000000 | -2.119009000000 |
| O          | 1.764759000000  | -1.311148000000 | 2.854456000000  |
| N          | -0.144068000000 | 0.821630000000  | -0.250781000000 |
| N          | 0.233531000000  | -1.656111000000 | 0.173645000000  |
| C          | 2.128056000000  | 1.446509000000  | -0.266695000000 |
| N          | 1.303046000000  | -0.935434000000 | -0.309810000000 |
| H          | -4.899522000000 | 0.529279000000  | -0.141656000000 |
| C          | -2.522428000000 | 3.567973000000  | -0.471062000000 |
| C          | -1.986758000000 | 2.298857000000  | -0.251742000000 |
| C          | 1.630554000000  | 2.756527000000  | -0.354798000000 |
| C          | 0.522172000000  | -2.935826000000 | 0.021883000000  |
| N          | 0.343697000000  | 3.095716000000  | -0.393819000000 |
| C          | 1.146251000000  | 0.454071000000  | -0.294210000000 |
| C          | -3.899533000000 | 3.744041000000  | -0.550636000000 |
| C          | -2.831310000000 | 1.168356000000  | -0.091898000000 |
| C          | 1.785404000000  | -3.059900000000 | -0.593648000000 |
| C          | 2.251753000000  | -1.788841000000 | -0.829604000000 |
| C          | -4.735354000000 | 2.638955000000  | -0.437778000000 |
| C          | -0.532415000000 | 2.104300000000  | -0.290474000000 |
| C          | -4.207556000000 | 1.362879000000  | -0.217610000000 |
| Cl         | -1.206491000000 | 0.039441000000  | 2.465023000000  |
| H          | 0.856252000000  | -0.998045000000 | 2.719657000000  |
| H          | 1.952197000000  | -1.138146000000 | 3.782003000000  |
| H          | -4.314393000000 | 4.731751000000  | -0.718715000000 |
| H          | -5.810563000000 | 2.757163000000  | -0.524467000000 |
| H          | 2.280077000000  | -3.977223000000 | -0.874847000000 |
| H          | -1.845089000000 | 4.406502000000  | -0.595428000000 |
| Cl         | -3.509764000000 | -1.818451000000 | 0.778976000000  |
| C          | 3.462898000000  | -1.391091000000 | -1.601538000000 |
| H          | 4.310417000000  | -1.167664000000 | -0.950522000000 |
| H          | 3.736027000000  | -2.226274000000 | -2.248059000000 |
| H          | 3.268642000000  | -0.518416000000 | -2.227947000000 |
| C          | -0.445903000000 | -3.994776000000 | 0.420197000000  |
| H          | -1.199874000000 | -4.123383000000 | -0.362831000000 |
| H          | 0.068308000000  | -4.945479000000 | 0.565982000000  |
| H          | -0.960770000000 | -3.716432000000 | 1.341950000000  |
| H          | -3.180066000000 | -0.267113000000 | 0.474097000000  |
| H          | 2.341937000000  | 3.577908000000  | -0.360140000000 |
| C          | 3.572704000000  | 1.223611000000  | -0.028719000000 |
| C          | 3.978142000000  | 0.467566000000  | 1.077367000000  |
| C          | 4.528466000000  | 1.801447000000  | -0.869404000000 |
| C          | 5.335733000000  | 0.278966000000  | 1.323352000000  |
| C          | 5.884333000000  | 1.605980000000  | -0.619143000000 |
| C          | 6.289646000000  | 0.842369000000  | 0.475364000000  |
| H          | 3.235785000000  | 0.012985000000  | 1.730673000000  |
| H          | 4.213597000000  | 2.378102000000  | -1.734525000000 |
| H          | 5.648338000000  | -0.312059000000 | 2.178309000000  |
| H          | 6.622657000000  | 2.043177000000  | -1.283417000000 |
| H          | 7.346564000000  | 0.686545000000  | 0.666435000000  |
| <b>IM2</b> |                 |                 |                 |

|            |                 |                 |                 |
|------------|-----------------|-----------------|-----------------|
| Rh         | -1.560373000000 | -0.519443000000 | 0.001595000000  |
| Cl         | -1.675731000000 | -0.787920000000 | -2.343832000000 |
| O          | 1.624166000000  | -1.307140000000 | 2.816761000000  |
| N          | -0.148405000000 | 0.829289000000  | -0.190246000000 |
| N          | 0.350884000000  | -1.732073000000 | -0.000511000000 |
| C          | 2.124595000000  | 1.464565000000  | -0.130173000000 |
| N          | 1.340484000000  | -0.894373000000 | -0.463619000000 |
| H          | -4.734229000000 | 0.280978000000  | -0.053757000000 |
| C          | -2.605155000000 | 3.539090000000  | -0.115046000000 |
| C          | -1.984826000000 | 2.287236000000  | -0.100337000000 |
| C          | 1.629930000000  | 2.776379000000  | -0.089380000000 |
| C          | 0.696983000000  | -2.953324000000 | -0.368068000000 |
| N          | 0.343451000000  | 3.117623000000  | -0.124936000000 |
| C          | 1.143726000000  | 0.477399000000  | -0.270104000000 |
| C          | -3.993379000000 | 3.608481000000  | -0.109296000000 |
| C          | -2.734497000000 | 1.090229000000  | -0.072222000000 |
| C          | 1.899340000000  | -2.916242000000 | -1.108385000000 |
| C          | 2.278038000000  | -1.598067000000 | -1.187892000000 |
| C          | -4.744607000000 | 2.430314000000  | -0.089609000000 |
| C          | -0.533588000000 | 2.120199000000  | -0.132926000000 |
| C          | -4.124010000000 | 1.178274000000  | -0.069927000000 |
| Cl         | -1.493356000000 | -0.337412000000 | 2.376688000000  |
| H          | 0.707362000000  | -1.150362000000 | 2.540944000000  |
| H          | 1.686172000000  | -0.912017000000 | 3.691808000000  |
| H          | -4.490930000000 | 4.572406000000  | -0.122903000000 |
| H          | -5.829470000000 | 2.486307000000  | -0.088987000000 |
| H          | 2.406993000000  | -3.751501000000 | -1.567246000000 |
| H          | -1.999253000000 | 4.439866000000  | -0.134021000000 |
| Cl         | -3.346879000000 | -2.242832000000 | 0.289966000000  |
| C          | 3.393713000000  | -1.010624000000 | -1.983933000000 |
| H          | 4.294370000000  | -0.864794000000 | -1.383555000000 |
| H          | 3.630498000000  | -1.703028000000 | -2.793300000000 |
| H          | 3.114111000000  | -0.050355000000 | -2.422385000000 |
| C          | -0.163317000000 | -4.126251000000 | -0.040494000000 |
| H          | -0.907889000000 | -4.280139000000 | -0.828144000000 |
| H          | 0.439884000000  | -5.032440000000 | 0.039185000000  |
| H          | -0.690462000000 | -3.963693000000 | 0.901663000000  |
| H          | -3.376762000000 | -2.190851000000 | 1.582352000000  |
| H          | 2.339793000000  | 3.594284000000  | 0.002461000000  |
| C          | 3.568227000000  | 1.212063000000  | 0.084918000000  |
| C          | 3.974637000000  | 0.278762000000  | 1.046139000000  |
| C          | 4.527843000000  | 1.929691000000  | -0.635921000000 |
| C          | 5.331733000000  | 0.054819000000  | 1.262371000000  |
| C          | 5.883500000000  | 1.702396000000  | -0.413540000000 |
| C          | 6.288364000000  | 0.761109000000  | 0.532362000000  |
| H          | 3.230198000000  | -0.272543000000 | 1.617389000000  |
| H          | 4.216327000000  | 2.644745000000  | -1.391910000000 |
| H          | 5.642740000000  | -0.673262000000 | 2.004743000000  |
| H          | 6.621965000000  | 2.254812000000  | -0.985545000000 |
| H          | 7.345070000000  | 0.580185000000  | 0.701319000000  |
| <b>TS2</b> |                 |                 |                 |
| Rh         | -1.475413000000 | -0.784097000000 | 0.090210000000  |
| Cl         | -1.587984000000 | -1.023659000000 | -2.272485000000 |

|          |                 |                 |                 |
|----------|-----------------|-----------------|-----------------|
| O        | -3.072536000000 | 2.071212000000  | 3.315034000000  |
| N        | -0.118428000000 | 0.589281000000  | -0.088035000000 |
| N        | 0.434935000000  | -1.957484000000 | 0.067357000000  |
| C        | 2.135090000000  | 1.284091000000  | -0.029442000000 |
| N        | 1.421817000000  | -1.096524000000 | -0.359872000000 |
| H        | -4.661476000000 | -0.108045000000 | 0.105088000000  |
| C        | -2.655476000000 | 3.231925000000  | -0.025276000000 |
| C        | -1.992748000000 | 2.001831000000  | -0.014740000000 |
| C        | 1.607398000000  | 2.582796000000  | -0.003234000000 |
| C        | 0.793374000000  | -3.164905000000 | -0.326545000000 |
| N        | 0.312617000000  | 2.889482000000  | -0.048544000000 |
| C        | 1.184696000000  | 0.267163000000  | -0.168038000000 |
| C        | -4.046067000000 | 3.248644000000  | 0.009099000000  |
| C        | -2.700113000000 | 0.782345000000  | 0.027998000000  |
| C        | 2.008237000000  | -3.098443000000 | -1.048343000000 |
| C        | 2.376070000000  | -1.777503000000 | -1.092510000000 |
| C        | -4.755889000000 | 2.043546000000  | 0.050658000000  |
| C        | -0.539110000000 | 1.873023000000  | -0.046462000000 |
| C        | -4.091195000000 | 0.814542000000  | 0.062237000000  |
| Cl       | -1.461719000000 | -0.679287000000 | 2.448116000000  |
| H        | -2.618729000000 | 1.271876000000  | 3.004761000000  |
| H        | -3.425555000000 | 2.478249000000  | 2.516085000000  |
| H        | -4.578341000000 | 4.193707000000  | 0.003461000000  |
| H        | -5.841262000000 | 2.062583000000  | 0.081315000000  |
| H        | 2.527892000000  | -3.916836000000 | -1.523687000000 |
| H        | -2.084513000000 | 4.154633000000  | -0.053932000000 |
| Cl       | -3.799224000000 | -2.863188000000 | -0.497699000000 |
| C        | 3.496594000000  | -1.164589000000 | -1.861449000000 |
| H        | 4.379439000000  | -0.998096000000 | -1.240509000000 |
| H        | 3.768206000000  | -1.852459000000 | -2.663564000000 |
| H        | 3.204884000000  | -0.212056000000 | -2.308836000000 |
| C        | -0.057103000000 | -4.351452000000 | -0.029415000000 |
| H        | -0.316144000000 | -4.871378000000 | -0.955534000000 |
| H        | 0.482080000000  | -5.054918000000 | 0.610841000000  |
| H        | -0.976641000000 | -4.045080000000 | 0.473087000000  |
| H        | -3.178523000000 | -2.372184000000 | -1.539954000000 |
| H        | 2.295064000000  | 3.419789000000  | 0.083199000000  |
| C        | 3.582604000000  | 1.070089000000  | 0.197802000000  |
| C        | 4.009247000000  | 0.165956000000  | 1.177237000000  |
| C        | 4.529210000000  | 1.796448000000  | -0.531121000000 |
| C        | 5.368864000000  | -0.026971000000 | 1.403505000000  |
| C        | 5.888462000000  | 1.602482000000  | -0.300541000000 |
| C        | 6.311046000000  | 0.686393000000  | 0.661972000000  |
| H        | 3.280308000000  | -0.389068000000 | 1.760524000000  |
| H        | 4.204644000000  | 2.491373000000  | -1.300096000000 |
| H        | 5.692171000000  | -0.734045000000 | 2.160278000000  |
| H        | 6.616244000000  | 2.161152000000  | -0.879858000000 |
| H        | 7.370688000000  | 0.530251000000  | 0.835926000000  |
| <b>P</b> |                 |                 |                 |
| Rh       | -1.287662000000 | 0.893036000000  | 0.069957000000  |
| Cl       | -1.589353000000 | 0.640690000000  | -2.288704000000 |
| O        | -3.394904000000 | 1.006515000000  | 0.438069000000  |
| N        | 0.669099000000  | 0.916367000000  | -0.172362000000 |

|    |                 |                 |                 |
|----|-----------------|-----------------|-----------------|
| N  | -0.679610000000 | -1.317371000000 | 0.176920000000  |
| C  | 2.777609000000  | -0.130902000000 | 0.004798000000  |
| N  | 0.622387000000  | -1.377547000000 | -0.268126000000 |
| H  | -3.092887000000 | 3.567142000000  | -0.090799000000 |
| C  | 0.661705000000  | 4.574134000000  | -0.352813000000 |
| C  | 0.291824000000  | 3.232008000000  | -0.228341000000 |
| C  | 3.297212000000  | 1.169693000000  | -0.066727000000 |
| C  | -1.229003000000 | -2.477816000000 | -0.132981000000 |
| N  | 2.574975000000  | 2.280558000000  | -0.203697000000 |
| C  | 1.390224000000  | -0.211833000000 | -0.154417000000 |
| C  | -0.328365000000 | 5.549657000000  | -0.387697000000 |
| C  | -1.064434000000 | 2.851846000000  | -0.131381000000 |
| C  | -0.299214000000 | -3.291882000000 | -0.820906000000 |
| C  | 0.861498000000  | -2.566841000000 | -0.925122000000 |
| C  | -1.673637000000 | 5.179086000000  | -0.295752000000 |
| C  | 1.254517000000  | 2.131355000000  | -0.199806000000 |
| C  | -2.044746000000 | 3.838129000000  | -0.166694000000 |
| Cl | -1.041639000000 | 1.113733000000  | 2.409695000000  |
| H  | -3.970707000000 | 0.419937000000  | -0.077296000000 |
| H  | -3.570446000000 | 0.841938000000  | 1.374359000000  |
| H  | -0.058705000000 | 6.595742000000  | -0.488566000000 |
| H  | -2.443337000000 | 5.944990000000  | -0.324142000000 |
| H  | -0.470288000000 | -4.276378000000 | -1.230029000000 |
| H  | 1.712310000000  | 4.838455000000  | -0.425399000000 |
| Cl | -4.703603000000 | -0.564385000000 | -2.131795000000 |
| C  | 2.101397000000  | -2.917863000000 | -1.675565000000 |
| H  | 2.855509000000  | -3.370333000000 | -1.027484000000 |
| H  | 1.835380000000  | -3.640525000000 | -2.448401000000 |
| H  | 2.543390000000  | -2.043355000000 | -2.157888000000 |
| C  | -2.648985000000 | -2.772960000000 | 0.209611000000  |
| H  | -3.257291000000 | -2.819272000000 | -0.698101000000 |
| H  | -2.727152000000 | -3.737944000000 | 0.716446000000  |
| H  | -3.053047000000 | -1.997560000000 | 0.863249000000  |
| H  | -3.457308000000 | -0.136169000000 | -2.323923000000 |
| H  | 4.371246000000  | 1.307049000000  | 0.026647000000  |
| C  | 3.654285000000  | -1.268220000000 | 0.367194000000  |
| C  | 3.270435000000  | -2.135092000000 | 1.397691000000  |
| C  | 4.881374000000  | -1.461866000000 | -0.274489000000 |
| C  | 4.093605000000  | -3.195871000000 | 1.762516000000  |
| C  | 5.705464000000  | -2.521771000000 | 0.096430000000  |
| C  | 5.311142000000  | -3.393695000000 | 1.110578000000  |
| H  | 2.326325000000  | -1.982139000000 | 1.912457000000  |
| H  | 5.180600000000  | -0.801096000000 | -1.082915000000 |
| H  | 3.785472000000  | -3.866409000000 | 2.558056000000  |
| H  | 6.652096000000  | -2.670376000000 | -0.412778000000 |
| H  | 5.951814000000  | -4.222333000000 | 1.394614000000  |

Table S3. Optimized geometries of the ground state of rhodium(III) complexes with  $\text{HL}^{2,5}$  from Figure 4 in Cartesian (XYZ) coordinates as calculated in Gaussian at the  $\omega\text{B97XD/ Stuttgart RSC 1997/6-31+g(d)}$  level of theory in the gas phase.

| R  |                |                |                |
|----|----------------|----------------|----------------|
| Rh | 1.485633000000 | 0.799075000000 | 0.175140000000 |

|            |                 |                 |                 |
|------------|-----------------|-----------------|-----------------|
| Cl         | 1.979527000000  | 0.798927000000  | -2.108007000000 |
| O          | -1.187257000000 | -1.589126000000 | 2.577531000000  |
| N          | 0.166540000000  | -0.720865000000 | -0.188555000000 |
| N          | -0.151756000000 | 1.797609000000  | -0.178859000000 |
| C          | -2.123096000000 | -1.318263000000 | -0.313596000000 |
| N          | -1.259017000000 | 1.036500000000  | -0.487005000000 |
| H          | 4.874541000000  | -1.284385000000 | 1.205986000000  |
| C          | 2.457940000000  | -3.294389000000 | -1.063672000000 |
| C          | 1.955532000000  | -2.335922000000 | -0.181777000000 |
| C          | -1.652543000000 | -2.633270000000 | -0.402556000000 |
| C          | -0.410205000000 | 3.059314000000  | -0.471864000000 |
| N          | -0.374940000000 | -2.988790000000 | -0.422669000000 |
| C          | -1.114792000000 | -0.353768000000 | -0.335403000000 |
| C          | 3.829600000000  | -3.513327000000 | -1.140156000000 |
| C          | 2.834136000000  | -1.632084000000 | 0.654004000000  |
| C          | -1.710427000000 | 3.124521000000  | -1.014205000000 |
| C          | -2.214744000000 | 1.849851000000  | -1.058001000000 |
| C          | 4.705966000000  | -2.783644000000 | -0.337613000000 |
| C          | 0.512978000000  | -2.016858000000 | -0.236532000000 |
| C          | 4.206414000000  | -1.850292000000 | 0.566063000000  |
| Cl         | 0.910852000000  | 0.761065000000  | 2.496341000000  |
| H          | -0.525076000000 | -0.879361000000 | 2.666413000000  |
| H          | -1.020245000000 | -2.189687000000 | 3.307472000000  |
| H          | 4.216538000000  | -4.245028000000 | -1.842070000000 |
| H          | 5.776104000000  | -2.945206000000 | -0.416848000000 |
| H          | -2.199619000000 | 4.011403000000  | -1.387167000000 |
| H          | 1.773385000000  | -3.842099000000 | -1.702265000000 |
| C          | -3.483265000000 | 1.419066000000  | -1.710938000000 |
| H          | -4.285233000000 | 1.240541000000  | -0.992244000000 |
| H          | -3.793269000000 | 2.219175000000  | -2.385400000000 |
| H          | -3.341245000000 | 0.511237000000  | -2.299997000000 |
| C          | 0.577541000000  | 4.153541000000  | -0.288169000000 |
| H          | 1.405263000000  | 4.026169000000  | -0.991803000000 |
| H          | 0.095257000000  | 5.117261000000  | -0.458786000000 |
| H          | 1.004757000000  | 4.121442000000  | 0.716328000000  |
| H          | -2.378968000000 | -3.441769000000 | -0.433504000000 |
| C          | -3.558044000000 | -1.077823000000 | -0.045623000000 |
| C          | -3.922968000000 | -0.359645000000 | 1.098097000000  |
| C          | -4.547958000000 | -1.610899000000 | -0.875392000000 |
| C          | -5.268686000000 | -0.141886000000 | 1.379700000000  |
| C          | -5.892515000000 | -1.393114000000 | -0.588849000000 |
| C          | -6.254417000000 | -0.649736000000 | 0.533912000000  |
| H          | -3.151594000000 | -0.001996000000 | 1.773421000000  |
| H          | -4.264808000000 | -2.169219000000 | -1.763876000000 |
| H          | -5.547018000000 | 0.415988000000  | 2.268075000000  |
| H          | -6.656436000000 | -1.797111000000 | -1.245501000000 |
| H          | -7.302920000000 | -0.476013000000 | 0.754121000000  |
| H          | 2.457005000000  | -0.982374000000 | 1.444505000000  |
| Cl         | 3.185133000000  | 2.300376000000  | 0.624409000000  |
| <b>TS1</b> |                 |                 |                 |
| Rh         | -1.536820000000 | -0.615525000000 | 0.005896000000  |
| Cl         | -1.320192000000 | -0.881629000000 | -2.329258000000 |
| O          | 1.416973000000  | -0.002867000000 | 2.811706000000  |



|          |                 |                 |                 |
|----------|-----------------|-----------------|-----------------|
| N        | -0.108322000000 | 0.728064000000  | -0.164351000000 |
| N        | 0.241315000000  | -1.755847000000 | 0.178664000000  |
| C        | 2.162148000000  | 1.350981000000  | -0.223660000000 |
| N        | 1.331554000000  | -1.033238000000 | -0.249109000000 |
| H        | -4.869699000000 | 0.496353000000  | 0.133641000000  |
| C        | -2.466925000000 | 3.501129000000  | -0.288143000000 |
| C        | -1.949935000000 | 2.205535000000  | -0.255868000000 |
| C        | 1.663188000000  | 2.656786000000  | -0.329636000000 |
| C        | 0.511034000000  | -3.031777000000 | -0.015687000000 |
| N        | 0.378930000000  | 2.997751000000  | -0.388885000000 |
| C        | 1.177129000000  | 0.358637000000  | -0.218872000000 |
| C        | -3.836605000000 | 3.711867000000  | -0.196435000000 |
| C        | -2.807634000000 | 1.081246000000  | -0.135515000000 |
| C        | 1.787633000000  | -3.153467000000 | -0.605102000000 |
| C        | 2.274754000000  | -1.881790000000 | -0.785352000000 |
| C        | -4.683773000000 | 2.619938000000  | -0.044551000000 |
| C        | -0.497964000000 | 2.006556000000  | -0.274197000000 |
| C        | -4.175830000000 | 1.320141000000  | -0.002828000000 |
| Cl       | -1.673335000000 | -0.382725000000 | 2.361924000000  |
| H        | 0.483314000000  | -0.265497000000 | 2.711656000000  |
| H        | 1.407107000000  | 0.648614000000  | 3.517411000000  |
| H        | -4.237810000000 | 4.719297000000  | -0.226648000000 |
| H        | -5.754571000000 | 2.769925000000  | 0.052009000000  |
| H        | 2.272780000000  | -4.066022000000 | -0.917214000000 |
| H        | -1.773731000000 | 4.331972000000  | -0.371020000000 |
| Cl       | -3.515595000000 | -2.018714000000 | -0.010022000000 |
| C        | 3.500644000000  | -1.485933000000 | -1.536444000000 |
| H        | 4.340288000000  | -1.251599000000 | -0.879447000000 |
| H        | 3.783544000000  | -2.324085000000 | -2.175767000000 |
| H        | 3.311205000000  | -0.620424000000 | -2.174637000000 |
| C        | -0.498254000000 | -4.081107000000 | 0.296273000000  |
| H        | -1.198551000000 | -4.175277000000 | -0.540010000000 |
| H        | -0.012659000000 | -5.044651000000 | 0.461110000000  |
| H        | -1.073946000000 | -3.804210000000 | 1.182039000000  |
| H        | -3.159320000000 | -0.421931000000 | -0.308993000000 |
| H        | 2.376025000000  | 3.477986000000  | -0.345418000000 |
| C        | 3.614074000000  | 1.141681000000  | -0.013918000000 |
| C        | 4.058772000000  | 0.420124000000  | 1.099827000000  |
| C        | 4.543748000000  | 1.700461000000  | -0.896201000000 |
| C        | 5.424260000000  | 0.245818000000  | 1.308672000000  |
| C        | 5.907749000000  | 1.520366000000  | -0.683060000000 |
| C        | 6.349986000000  | 0.788247000000  | 0.417803000000  |
| H        | 3.328271000000  | 0.007972000000  | 1.791256000000  |
| H        | 4.198526000000  | 2.251486000000  | -1.767062000000 |
| H        | 5.765136000000  | -0.315021000000 | 2.173281000000  |
| H        | 6.623640000000  | 1.944768000000  | -1.379838000000 |
| H        | 7.413110000000  | 0.644302000000  | 0.582841000000  |
| <b>P</b> |                 |                 |                 |
| Rh       | -1.297759000000 | 0.903927000000  | 0.052670000000  |
| Cl       | -1.572806000000 | 0.589838000000  | -2.299680000000 |
| O        | -3.399451000000 | 1.039796000000  | 0.424944000000  |
| N        | 0.661438000000  | 0.920630000000  | -0.161884000000 |
| N        | -0.674751000000 | -1.329941000000 | 0.190571000000  |

|    |                 |                 |                 |
|----|-----------------|-----------------|-----------------|
| C  | 2.768844000000  | -0.127016000000 | 0.020641000000  |
| N  | 0.618235000000  | -1.373476000000 | -0.269855000000 |
| H  | -3.093953000000 | 3.566315000000  | -0.175029000000 |
| C  | 0.666248000000  | 4.576617000000  | -0.338879000000 |
| C  | 0.290904000000  | 3.234960000000  | -0.222440000000 |
| C  | 3.288141000000  | 1.175549000000  | -0.028838000000 |
| C  | -1.215824000000 | -2.491501000000 | -0.121194000000 |
| N  | 2.571334000000  | 2.285511000000  | -0.164611000000 |
| C  | 1.382019000000  | -0.203490000000 | -0.145328000000 |
| C  | -0.321663000000 | 5.549527000000  | -0.399912000000 |
| C  | -1.066134000000 | 2.854278000000  | -0.157046000000 |
| C  | -0.287952000000 | -3.290477000000 | -0.830731000000 |
| C  | 0.862183000000  | -2.550584000000 | -0.942686000000 |
| C  | -1.668627000000 | 5.176634000000  | -0.343488000000 |
| C  | 1.247867000000  | 2.138486000000  | -0.177812000000 |
| C  | -2.045154000000 | 3.838883000000  | -0.221798000000 |
| Cl | -1.117991000000 | 1.106738000000  | 2.383656000000  |
| H  | -3.979297000000 | 0.436829000000  | -0.070480000000 |
| H  | -3.506632000000 | 0.895185000000  | 1.375616000000  |
| H  | -0.051440000000 | 6.596156000000  | -0.494200000000 |
| H  | -2.437396000000 | 5.942644000000  | -0.394161000000 |
| H  | -0.455842000000 | -4.270137000000 | -1.252902000000 |
| H  | 1.719843000000  | 4.834951000000  | -0.383670000000 |
| Cl | -4.631136000000 | -0.614129000000 | -1.997848000000 |
| C  | 2.097065000000  | -2.873774000000 | -1.715199000000 |
| H  | 2.865177000000  | -3.335427000000 | -1.089981000000 |
| H  | 1.828964000000  | -3.575059000000 | -2.507457000000 |
| H  | 2.525424000000  | -1.982336000000 | -2.179346000000 |
| C  | -2.628018000000 | -2.798474000000 | 0.243733000000  |
| H  | -3.261923000000 | -2.812825000000 | -0.647515000000 |
| H  | -2.696863000000 | -3.775159000000 | 0.730189000000  |
| H  | -3.008586000000 | -2.038689000000 | 0.929677000000  |
| H  | -3.391713000000 | -0.157077000000 | -2.256571000000 |
| H  | 4.361700000000  | 1.311942000000  | 0.081733000000  |
| C  | 3.640577000000  | -1.270352000000 | 0.374827000000  |
| C  | 3.249920000000  | -2.151169000000 | 1.390576000000  |
| C  | 4.870980000000  | -1.461413000000 | -0.261053000000 |
| C  | 4.066750000000  | -3.220337000000 | 1.743112000000  |
| C  | 5.690174000000  | -2.528685000000 | 0.098209000000  |
| C  | 5.286868000000  | -3.414172000000 | 1.095888000000  |
| H  | 2.304383000000  | -1.998044000000 | 1.902942000000  |
| H  | 5.176190000000  | -0.788487000000 | -1.057744000000 |
| H  | 3.752734000000  | -3.899975000000 | 2.528756000000  |
| H  | 6.640120000000  | -2.672316000000 | -0.406684000000 |
| H  | 5.923401000000  | -4.248619000000 | 1.372475000000  |

Table S4. Optimized geometries of the ground state of rhodium(III) complexes with **HL<sup>2,6</sup>** from Figure S25 in Cartesian (XYZ) coordinates as calculated in Gaussian at the  $\omega$ B97XD/Stuttgart RSC 1997/6-31+g(d) level of theory in **EtOH continuum solvation model**.

|    | <b>R</b>        |                |                 |
|----|-----------------|----------------|-----------------|
| Rh | -1.926434000000 | 0.396112000000 | -0.259279000000 |
| Cl | -1.554606000000 | 0.731982000000 | -2.556008000000 |

|            |                 |                 |                 |
|------------|-----------------|-----------------|-----------------|
| O          | 0.657518000000  | -1.291286000000 | 2.738376000000  |
| N          | 0.089988000000  | 0.731795000000  | 0.008217000000  |
| N          | -1.235199000000 | -1.423368000000 | -0.365075000000 |
| C          | 2.234318000000  | -0.288678000000 | -0.146941000000 |
| N          | 0.126391000000  | -1.543975000000 | -0.239390000000 |
| H          | -2.512559000000 | 4.670881000000  | 2.036564000000  |
| C          | 0.083283000000  | 4.161619000000  | -0.797479000000 |
| C          | -0.116952000000 | 3.161571000000  | 0.159854000000  |
| C          | 2.793977000000  | 0.983969000000  | -0.044834000000 |
| C          | -1.755277000000 | -2.642128000000 | -0.424293000000 |
| N          | 2.020075000000  | 2.077031000000  | 0.062207000000  |
| C          | 0.855444000000  | -0.368518000000 | -0.107856000000 |
| C          | -0.669048000000 | 5.330239000000  | -0.744772000000 |
| C          | -1.049243000000 | 3.349022000000  | 1.185005000000  |
| C          | -0.700784000000 | -3.573614000000 | -0.330668000000 |
| C          | 4.256793000000  | 1.194961000000  | -0.077809000000 |
| C          | 0.471082000000  | -2.872201000000 | -0.201899000000 |
| C          | -1.608447000000 | 5.513646000000  | 0.271630000000  |
| C          | 0.706598000000  | 1.930185000000  | 0.081602000000  |
| C          | -1.792188000000 | 4.527151000000  | 1.237991000000  |
| C          | 6.139007000000  | 2.628220000000  | -0.586893000000 |
| C          | 5.142466000000  | 0.192181000000  | 0.337322000000  |
| Cl         | -2.242669000000 | 0.083817000000  | 2.076377000000  |
| C          | 7.016732000000  | 1.624938000000  | -0.174940000000 |
| C          | 6.516253000000  | 0.409816000000  | 0.292029000000  |
| H          | 1.194881000000  | -0.629764000000 | 3.184195000000  |
| H          | -0.223432000000 | -0.891025000000 | 2.662031000000  |
| H          | -0.522898000000 | 6.098757000000  | -1.496696000000 |
| H          | -2.191430000000 | 6.428242000000  | 0.311597000000  |
| H          | 4.077025000000  | 3.194842000000  | -0.848783000000 |
| H          | 6.526034000000  | 3.573819000000  | -0.952439000000 |
| H          | 8.088566000000  | 1.790877000000  | -0.215141000000 |
| H          | 7.195753000000  | -0.367122000000 | 0.626314000000  |
| H          | 4.767914000000  | -0.749857000000 | 0.725868000000  |
| H          | -0.802445000000 | -4.647865000000 | -0.344362000000 |
| C          | 4.765256000000  | 2.418879000000  | -0.531913000000 |
| H          | 0.818649000000  | 4.015482000000  | -1.582274000000 |
| Cl         | -4.241192000000 | 0.241031000000  | -0.615412000000 |
| C          | 1.850624000000  | -3.399596000000 | -0.022603000000 |
| H          | 2.314219000000  | -2.984732000000 | 0.876353000000  |
| H          | 1.787471000000  | -4.481757000000 | 0.092252000000  |
| H          | 2.482759000000  | -3.189623000000 | -0.889992000000 |
| C          | -3.208883000000 | -2.921394000000 | -0.552598000000 |
| H          | -3.612178000000 | -2.458612000000 | -1.455592000000 |
| H          | -3.366932000000 | -3.999085000000 | -0.595951000000 |
| H          | -3.751160000000 | -2.508196000000 | 0.300969000000  |
| H          | 2.850199000000  | -1.158902000000 | -0.297517000000 |
| H          | -1.187881000000 | 2.583417000000  | 1.941478000000  |
| <b>IM1</b> |                 |                 |                 |
| Rh         | -1.946134000000 | 0.154873000000  | -0.211415000000 |
| Cl         | -1.784465000000 | -0.028579000000 | -2.562874000000 |
| O          | 0.486396000000  | -1.571991000000 | 2.724842000000  |
| N          | 0.107018000000  | 0.149168000000  | -0.147885000000 |

|            |                 |                 |                 |
|------------|-----------------|-----------------|-----------------|
| N          | -1.577083000000 | -1.751954000000 | -0.064368000000 |
| C          | 2.038275000000  | -1.228092000000 | -0.287715000000 |
| N          | -0.257406000000 | -2.107985000000 | -0.197234000000 |
| H          | -1.874723000000 | 4.681186000000  | -1.460273000000 |
| H          | -0.852356000000 | 2.449574000000  | -1.757248000000 |
| C          | 0.663206000000  | 3.361247000000  | 1.156461000000  |
| C          | 0.302897000000  | 2.565866000000  | 0.064452000000  |
| C          | 2.809165000000  | -0.071664000000 | -0.171280000000 |
| C          | -2.288812000000 | -2.852847000000 | 0.131347000000  |
| N          | 2.237399000000  | 1.138297000000  | -0.045493000000 |
| C          | 0.667509000000  | -1.071323000000 | -0.218975000000 |
| C          | 0.088277000000  | 4.617700000000  | 1.316488000000  |
| C          | -0.604471000000 | 3.047728000000  | -0.884688000000 |
| C          | -1.403459000000 | -3.951332000000 | 0.133701000000  |
| C          | 4.286919000000  | -0.121980000000 | -0.191036000000 |
| C          | -0.134119000000 | -3.469174000000 | -0.057340000000 |
| C          | -0.832502000000 | 5.092047000000  | 0.380634000000  |
| C          | 0.918398000000  | 1.222539000000  | -0.064266000000 |
| C          | -1.171911000000 | 4.310709000000  | -0.721474000000 |
| C          | 6.398857000000  | 0.964094000000  | -0.658764000000 |
| C          | 4.977991000000  | -1.276823000000 | 0.198667000000  |
| Cl         | -2.039375000000 | 0.402209000000  | 2.138044000000  |
| C          | 7.081177000000  | -0.190901000000 | -0.275846000000 |
| C          | 6.368575000000  | -1.308428000000 | 0.158038000000  |
| H          | 1.226917000000  | -1.012060000000 | 2.976361000000  |
| H          | -0.276779000000 | -0.973931000000 | 2.677924000000  |
| H          | 0.357992000000  | 5.227241000000  | 2.172736000000  |
| H          | -1.280592000000 | 6.071979000000  | 0.509562000000  |
| H          | 4.473983000000  | 1.897695000000  | -0.908263000000 |
| H          | 6.949554000000  | 1.835801000000  | -0.996793000000 |
| H          | 8.165575000000  | -0.219363000000 | -0.312312000000 |
| H          | 6.894712000000  | -2.204242000000 | 0.470816000000  |
| H          | 4.441953000000  | -2.147196000000 | 0.563703000000  |
| H          | -1.676159000000 | -4.986005000000 | 0.273547000000  |
| C          | 5.009225000000  | 1.002638000000  | -0.610801000000 |
| H          | 1.379188000000  | 2.987696000000  | 1.881497000000  |
| Cl         | -4.272080000000 | 0.380851000000  | -0.354971000000 |
| C          | 1.145172000000  | -4.227809000000 | -0.091257000000 |
| H          | 1.808761000000  | -3.920987000000 | 0.722137000000  |
| H          | 0.916999000000  | -5.285465000000 | 0.040812000000  |
| H          | 1.663262000000  | -4.108972000000 | -1.046534000000 |
| C          | -3.763532000000 | -2.865972000000 | 0.312327000000  |
| H          | -4.263293000000 | -2.596579000000 | -0.621326000000 |
| H          | -4.081066000000 | -3.864553000000 | 0.613191000000  |
| H          | -4.064467000000 | -2.140620000000 | 1.070721000000  |
| H          | 2.495552000000  | -2.192710000000 | -0.425865000000 |
| <b>TS1</b> |                 |                 |                 |
| Rh         | -1.815383000000 | 0.164518000000  | -0.121915000000 |
| Cl         | -1.552809000000 | 0.349962000000  | -2.467341000000 |
| O          | 0.578500000000  | -1.956699000000 | 2.760957000000  |
| N          | 0.136559000000  | 0.052853000000  | -0.008181000000 |
| N          | -1.448929000000 | -1.902525000000 | -0.263884000000 |
| C          | 2.146756000000  | -1.145687000000 | -0.183825000000 |

|            |                 |                 |                 |
|------------|-----------------|-----------------|-----------------|
| N          | -0.108022000000 | -2.200041000000 | -0.227251000000 |
| H          | -3.304064000000 | 3.325760000000  | 0.402874000000  |
| H          | -2.811026000000 | 1.516276000000  | -0.235990000000 |
| C          | 0.553193000000  | 3.649593000000  | 0.367453000000  |
| C          | -0.031595000000 | 2.398737000000  | 0.169465000000  |
| C          | 2.804719000000  | 0.085048000000  | -0.068479000000 |
| C          | -2.104378000000 | -3.046836000000 | -0.276218000000 |
| N          | 2.139644000000  | 1.249608000000  | 0.045200000000  |
| C          | 0.763496000000  | -1.123790000000 | -0.133584000000 |
| C          | -0.241651000000 | 4.774606000000  | 0.556695000000  |
| C          | -1.443503000000 | 2.246993000000  | 0.148937000000  |
| C          | -1.177277000000 | -4.115902000000 | -0.238016000000 |
| C          | 4.282538000000  | 0.163126000000  | -0.093548000000 |
| C          | 0.077587000000  | -3.562423000000 | -0.195049000000 |
| C          | -1.624841000000 | 4.635252000000  | 0.570272000000  |
| C          | 0.820521000000  | 1.207383000000  | 0.056775000000  |
| C          | -2.219885000000 | 3.385157000000  | 0.375775000000  |
| C          | 6.290131000000  | 1.410301000000  | -0.614866000000 |
| C          | 5.071972000000  | -0.906389000000 | 0.348387000000  |
| Cl         | -2.041413000000 | -0.067659000000 | 2.231876000000  |
| C          | 7.071508000000  | 0.340580000000  | -0.176938000000 |
| C          | 6.460381000000  | -0.814444000000 | 0.309838000000  |
| H          | 1.246244000000  | -1.358543000000 | 3.109515000000  |
| H          | -0.227826000000 | -1.420302000000 | 2.695065000000  |
| H          | 0.215908000000  | 5.746122000000  | 0.707622000000  |
| H          | -2.259049000000 | 5.500112000000  | 0.736486000000  |
| H          | 4.290605000000  | 2.154829000000  | -0.907255000000 |
| H          | 6.762051000000  | 2.310093000000  | -0.995784000000 |
| H          | 8.154160000000  | 0.409406000000  | -0.211311000000 |
| H          | 7.064004000000  | -1.643182000000 | 0.664961000000  |
| H          | 4.611719000000  | -1.802302000000 | 0.753361000000  |
| H          | -1.407442000000 | -5.170459000000 | -0.232528000000 |
| C          | 4.902554000000  | 1.326228000000  | -0.567822000000 |
| H          | 1.635771000000  | 3.722776000000  | 0.384735000000  |
| Cl         | -4.199904000000 | 0.699834000000  | -0.352694000000 |
| C          | 1.401572000000  | -4.235961000000 | -0.101948000000 |
| H          | 1.954440000000  | -3.892972000000 | 0.777103000000  |
| H          | 1.237528000000  | -5.309210000000 | -0.003938000000 |
| H          | 2.005885000000  | -4.067080000000 | -0.997724000000 |
| C          | -3.593554000000 | -3.082864000000 | -0.314961000000 |
| H          | -3.966720000000 | -2.500767000000 | -1.161379000000 |
| H          | -3.945540000000 | -4.110605000000 | -0.407661000000 |
| H          | -4.006420000000 | -2.648715000000 | 0.600066000000  |
| H          | 2.695244000000  | -2.060514000000 | -0.335779000000 |
| <b>IM2</b> |                 |                 |                 |
| Rh         | 1.810882000000  | -0.174185000000 | -0.078447000000 |
| Cl         | 1.848662000000  | -0.245047000000 | -2.449564000000 |
| O          | -1.293742000000 | -0.098297000000 | 2.979701000000  |
| N          | -0.140212000000 | -0.023711000000 | -0.083507000000 |
| N          | 1.450581000000  | 2.015761000000  | -0.138153000000 |
| C          | -2.143534000000 | 1.196844000000  | -0.198025000000 |
| N          | 0.097097000000  | 2.263349000000  | -0.134124000000 |
| H          | 3.324423000000  | -3.083880000000 | 0.054088000000  |

|            |                 |                 |                 |
|------------|-----------------|-----------------|-----------------|
| H          | 4.386375000000  | -0.443827000000 | -1.431325000000 |
| C          | -0.523498000000 | -3.661255000000 | 0.014269000000  |
| C          | -0.000528000000 | -2.366134000000 | -0.027429000000 |
| C          | -2.817025000000 | -0.028132000000 | -0.161782000000 |
| C          | 2.049647000000  | 3.189006000000  | -0.119147000000 |
| N          | -2.168821000000 | -1.203839000000 | -0.109854000000 |
| C          | -0.758189000000 | 1.163735000000  | -0.135772000000 |
| C          | 0.347021000000  | -4.743457000000 | 0.068278000000  |
| C          | 1.392071000000  | -2.126964000000 | -0.015576000000 |
| C          | 1.083318000000  | 4.224384000000  | -0.099127000000 |
| C          | -4.296854000000 | -0.084691000000 | -0.197899000000 |
| C          | -0.147474000000 | 3.621928000000  | -0.106213000000 |
| C          | 1.726390000000  | -4.520224000000 | 0.080542000000  |
| C          | -0.848589000000 | -1.174911000000 | -0.079212000000 |
| C          | 2.248304000000  | -3.224537000000 | 0.039378000000  |
| C          | -6.318671000000 | -1.269708000000 | -0.805612000000 |
| C          | -5.075213000000 | 0.960897000000  | 0.314586000000  |
| Cl         | 1.889222000000  | -0.099109000000 | 2.298500000000  |
| C          | -7.088849000000 | -0.223409000000 | -0.296910000000 |
| C          | -6.464791000000 | 0.888497000000  | 0.267607000000  |
| H          | -1.576879000000 | -1.016697000000 | 2.941827000000  |
| H          | -0.337896000000 | -0.120176000000 | 2.810616000000  |
| H          | -0.043240000000 | -5.755259000000 | 0.102641000000  |
| H          | 2.407063000000  | -5.365824000000 | 0.123295000000  |
| H          | -4.326558000000 | -2.015876000000 | -1.143967000000 |
| H          | -6.799863000000 | -2.136839000000 | -1.246250000000 |
| H          | -8.172221000000 | -0.277170000000 | -0.336696000000 |
| H          | -7.059160000000 | 1.698450000000  | 0.677645000000  |
| H          | -4.605087000000 | 1.821963000000  | 0.779463000000  |
| H          | 1.270707000000  | 5.287399000000  | -0.077574000000 |
| C          | -4.930131000000 | -1.204847000000 | -0.751067000000 |
| H          | -1.599497000000 | -3.806352000000 | 0.005052000000  |
| Cl         | 4.312665000000  | -0.365882000000 | -0.141943000000 |
| C          | -1.491273000000 | 4.266973000000  | -0.082321000000 |
| H          | -2.087737000000 | 3.933794000000  | 0.771440000000  |
| H          | -1.349830000000 | 5.344459000000  | 0.007024000000  |
| H          | -2.048083000000 | 4.076880000000  | -1.004488000000 |
| C          | 3.537642000000  | 3.298929000000  | -0.117514000000 |
| H          | 3.959434000000  | 2.816472000000  | -1.003268000000 |
| H          | 3.838888000000  | 4.347307000000  | -0.113738000000 |
| H          | 3.957379000000  | 2.810735000000  | 0.766115000000  |
| H          | -2.686473000000 | 2.121313000000  | -0.295130000000 |
| <b>TS2</b> |                 |                 |                 |
| Rh         | -1.742930000000 | 0.176274000000  | -0.032133000000 |
| Cl         | -1.687900000000 | 0.422966000000  | -2.403798000000 |
| O          | 0.784757000000  | -1.716023000000 | 2.771914000000  |
| N          | 0.190480000000  | 0.073884000000  | -0.003590000000 |
| N          | -1.349029000000 | -1.991633000000 | -0.233470000000 |
| C          | 2.216096000000  | -1.082408000000 | -0.270330000000 |
| N          | 0.009092000000  | -2.208395000000 | -0.237841000000 |
| H          | -3.355924000000 | 2.988238000000  | 0.295819000000  |
| H          | -3.810926000000 | 0.520580000000  | -1.933907000000 |
| C          | 0.472878000000  | 3.711300000000  | 0.362281000000  |

|          |                 |                 |                 |
|----------|-----------------|-----------------|-----------------|
| C        | -0.003242000000 | 2.405419000000  | 0.217864000000  |
| C        | 2.863261000000  | 0.149360000000  | -0.145847000000 |
| C        | -1.923796000000 | -3.175413000000 | -0.220914000000 |
| N        | 2.189930000000  | 1.300642000000  | 0.033033000000  |
| C        | 0.832711000000  | -1.094119000000 | -0.166360000000 |
| C        | -0.439708000000 | 4.752906000000  | 0.484158000000  |
| C        | -1.384796000000 | 2.123787000000  | 0.188241000000  |
| C        | -0.933400000000 | -4.191431000000 | -0.208894000000 |
| C        | 4.338000000000  | 0.245060000000  | -0.237482000000 |
| C        | 0.282729000000  | -3.562323000000 | -0.209066000000 |
| C        | -1.811536000000 | 4.482541000000  | 0.459282000000  |
| C        | 0.872689000000  | 1.242953000000  | 0.080669000000  |
| C        | -2.286356000000 | 3.176624000000  | 0.311870000000  |
| C        | 6.306390000000  | 1.523341000000  | -0.829807000000 |
| C        | 5.158109000000  | -0.827642000000 | 0.134760000000  |
| Cl       | -1.987299000000 | -0.052162000000 | 2.306331000000  |
| C        | 7.118051000000  | 0.449758000000  | -0.462142000000 |
| C        | 6.541773000000  | -0.722864000000 | 0.025325000000  |
| H        | -0.064809000000 | -1.249936000000 | 2.714751000000  |
| H        | 1.421005000000  | -1.039865000000 | 3.023725000000  |
| H        | -0.088635000000 | 5.773016000000  | 0.599130000000  |
| H        | -2.520485000000 | 5.299750000000  | 0.556848000000  |
| H        | 4.287645000000  | 2.256440000000  | -0.997733000000 |
| H        | 6.750967000000  | 2.437303000000  | -1.210140000000 |
| H        | 8.196910000000  | 0.528183000000  | -0.551367000000 |
| H        | 7.169295000000  | -1.555438000000 | 0.326009000000  |
| H        | 4.725866000000  | -1.738001000000 | 0.538464000000  |
| H        | -1.096966000000 | -5.258435000000 | -0.192324000000 |
| C        | 4.923632000000  | 1.425441000000  | -0.712416000000 |
| H        | 1.542456000000  | 3.897032000000  | 0.378940000000  |
| Cl       | -4.753927000000 | 0.491130000000  | -1.023619000000 |
| C        | 1.642365000000  | -4.169607000000 | -0.163027000000 |
| H        | 2.213639000000  | -3.804215000000 | 0.694969000000  |
| H        | 1.531786000000  | -5.249616000000 | -0.061367000000 |
| H        | 2.207040000000  | -3.975739000000 | -1.079553000000 |
| C        | -3.407102000000 | -3.310600000000 | -0.211780000000 |
| H        | -3.878450000000 | -2.326170000000 | -0.240904000000 |
| H        | -3.741753000000 | -3.890905000000 | -1.075675000000 |
| H        | -3.733497000000 | -3.834377000000 | 0.690734000000  |
| H        | 2.774035000000  | -1.981184000000 | -0.470453000000 |
| <b>P</b> |                 |                 |                 |
| Rh       | -1.364633000000 | 0.886868000000  | -0.150437000000 |
| Cl       | -1.300004000000 | 1.149693000000  | -2.531586000000 |
| O        | -3.506195000000 | 1.051536000000  | -0.106845000000 |
| N        | 0.597999000000  | 0.829792000000  | -0.120785000000 |
| N        | -0.881000000000 | -1.287670000000 | -0.347143000000 |
| C        | 2.666587000000  | -0.271392000000 | -0.280556000000 |
| N        | 0.484893000000  | -1.459749000000 | -0.315403000000 |
| H        | -3.038148000000 | 3.651567000000  | 0.130788000000  |
| C        | 0.768173000000  | 4.473777000000  | 0.223574000000  |
| C        | 0.328000000000  | 3.153614000000  | 0.092175000000  |
| C        | 3.272231000000  | 0.983803000000  | -0.156364000000 |
| C        | -1.412618000000 | -2.492864000000 | -0.341882000000 |

|    |                 |                 |                 |
|----|-----------------|-----------------|-----------------|
| N  | 2.560538000000  | 2.116975000000  | -0.027436000000 |
| C  | 1.279659000000  | -0.316276000000 | -0.238575000000 |
| C  | -0.170492000000 | 5.494407000000  | 0.325003000000  |
| C  | -1.048086000000 | 2.836927000000  | 0.059631000000  |
| C  | -0.391285000000 | -3.473595000000 | -0.310393000000 |
| C  | 4.747231000000  | 1.121986000000  | -0.186054000000 |
| C  | 0.803756000000  | -2.803334000000 | -0.288173000000 |
| C  | -1.534850000000 | 5.189541000000  | 0.291793000000  |
| C  | 1.242388000000  | 2.014798000000  | -0.022720000000 |
| C  | -1.975215000000 | 3.870285000000  | 0.158957000000  |
| C  | 6.699619000000  | 2.448660000000  | -0.723471000000 |
| C  | 5.583023000000  | 0.088903000000  | 0.256748000000  |
| Cl | -1.497370000000 | 0.620950000000  | 2.194119000000  |
| C  | 7.527250000000  | 1.414768000000  | -0.284500000000 |
| C  | 6.966432000000  | 0.237910000000  | 0.210563000000  |
| H  | -3.989526000000 | 0.549992000000  | -0.781918000000 |
| H  | -3.823347000000 | 0.750621000000  | 0.755696000000  |
| H  | 0.154650000000  | 6.524293000000  | 0.430073000000  |
| H  | -2.265229000000 | 5.990062000000  | 0.369266000000  |
| H  | 4.667992000000  | 3.107264000000  | -1.007923000000 |
| H  | 7.132201000000  | 3.365274000000  | -1.111233000000 |
| H  | 8.605956000000  | 1.528062000000  | -0.325114000000 |
| H  | 7.605991000000  | -0.563208000000 | 0.566432000000  |
| H  | 5.161799000000  | -0.823560000000 | 0.667522000000  |
| H  | -0.520452000000 | -4.545527000000 | -0.298856000000 |
| C  | 5.316822000000  | 2.307043000000  | -0.668582000000 |
| H  | 1.832934000000  | 4.685716000000  | 0.246881000000  |
| Cl | -4.310440000000 | -0.191536000000 | -3.056165000000 |
| C  | 2.180231000000  | -3.373851000000 | -0.232496000000 |
| H  | 2.734549000000  | -3.012090000000 | 0.637759000000  |
| H  | 2.095267000000  | -4.457763000000 | -0.150056000000 |
| H  | 2.750824000000  | -3.149612000000 | -1.138359000000 |
| C  | -2.892110000000 | -2.683664000000 | -0.342318000000 |
| H  | -3.353110000000 | -2.129532000000 | -1.163831000000 |
| H  | -3.138116000000 | -3.740610000000 | -0.452726000000 |
| H  | -3.321810000000 | -2.322368000000 | 0.596725000000  |
| H  | 3.260991000000  | -1.155079000000 | -0.438511000000 |
| H  | -3.078205000000 | 0.312025000000  | -2.976658000000 |

Table S5. Optimized geometries of the ground state of rhodium(III) complexes with  $\text{HL}^{2-6}$  from Figure S25 in Cartesian (XYZ) coordinates as calculated in Gaussian at the  $\omega\text{B97XD/ Stuttgart RSC 1997/6-31+g(d)}$  level of theory **in the gas phase**.

| R  |                 |                 |                 |
|----|-----------------|-----------------|-----------------|
| Rh | -1.870511000000 | 0.501816000000  | 0.003201000000  |
| Cl | -1.725218000000 | 1.029298000000  | -2.262326000000 |
| O  | 0.926978000000  | -1.544848000000 | 2.664011000000  |
| N  | 0.161801000000  | 0.783391000000  | 0.097597000000  |
| N  | -1.223350000000 | -1.311209000000 | -0.298483000000 |
| C  | 2.279051000000  | -0.255963000000 | -0.119399000000 |
| N  | 0.133148000000  | -1.479059000000 | -0.172631000000 |
| H  | -2.981456000000 | 4.323393000000  | 1.518571000000  |
| C  | 0.180191000000  | 4.229288000000  | -0.724092000000 |



|            |                 |                 |                 |
|------------|-----------------|-----------------|-----------------|
| C          | -0.091183000000 | 3.175724000000  | 0.150255000000  |
| C          | 2.848171000000  | 1.015650000000  | -0.036569000000 |
| C          | -1.780291000000 | -2.502296000000 | -0.427617000000 |
| N          | 2.093085000000  | 2.121366000000  | 0.057402000000  |
| C          | 0.899369000000  | -0.323088000000 | -0.046608000000 |
| C          | -0.698922000000 | 5.303990000000  | -0.803777000000 |
| C          | -1.224934000000 | 3.220919000000  | 0.972748000000  |
| C          | -0.753983000000 | -3.473963000000 | -0.378744000000 |
| C          | 4.316123000000  | 1.206890000000  | -0.081539000000 |
| C          | 0.436185000000  | -2.816354000000 | -0.202664000000 |
| C          | -1.844224000000 | 5.336261000000  | -0.008410000000 |
| C          | 0.778606000000  | 1.980157000000  | 0.119790000000  |
| C          | -2.100267000000 | 4.301066000000  | 0.886398000000  |
| C          | 6.214457000000  | 2.607659000000  | -0.615217000000 |
| C          | 5.191882000000  | 0.200333000000  | 0.342074000000  |
| Cl         | -1.899886000000 | -0.009841000000 | 2.341502000000  |
| C          | 7.081764000000  | 1.598059000000  | -0.200020000000 |
| C          | 6.568010000000  | 0.396768000000  | 0.285183000000  |
| H          | 1.234438000000  | -1.431370000000 | 3.566423000000  |
| H          | 0.042450000000  | -1.135139000000 | 2.645526000000  |
| H          | -0.499173000000 | 6.109857000000  | -1.502589000000 |
| H          | -2.536438000000 | 6.168438000000  | -0.086829000000 |
| H          | 4.154821000000  | 3.200216000000  | -0.859299000000 |
| H          | 6.611528000000  | 3.545428000000  | -0.990331000000 |
| H          | 8.155487000000  | 1.749514000000  | -0.248936000000 |
| H          | 7.239435000000  | -0.384132000000 | 0.627431000000  |
| H          | 4.803871000000  | -0.727541000000 | 0.752015000000  |
| H          | -0.888531000000 | -4.542708000000 | -0.444414000000 |
| C          | 4.838750000000  | 2.417912000000  | -0.549278000000 |
| H          | 1.058052000000  | 4.184221000000  | -1.359721000000 |
| Cl         | -4.173547000000 | 0.475982000000  | -0.077076000000 |
| C          | 1.800267000000  | -3.379969000000 | -0.010998000000 |
| H          | 2.235603000000  | -2.990596000000 | 0.914051000000  |
| H          | 1.715233000000  | -4.463853000000 | 0.076889000000  |
| H          | 2.460453000000  | -3.162023000000 | -0.856235000000 |
| C          | -3.246218000000 | -2.698778000000 | -0.568313000000 |
| H          | -3.640044000000 | -2.067874000000 | -1.368663000000 |
| H          | -3.458679000000 | -3.747688000000 | -0.780273000000 |
| H          | -3.753059000000 | -2.399266000000 | 0.353232000000  |
| H          | 2.885967000000  | -1.133636000000 | -0.265501000000 |
| H          | -1.397824000000 | 2.450784000000  | 1.721072000000  |
| <b>TS1</b> |                 |                 |                 |
| Rh         | -1.800232000000 | 0.174815000000  | -0.178048000000 |
| Cl         | -1.459268000000 | 0.356254000000  | -2.500911000000 |
| O          | 0.520498000000  | -1.996783000000 | 2.631830000000  |
| N          | 0.152621000000  | 0.062817000000  | -0.038068000000 |
| N          | -1.433234000000 | -1.890117000000 | -0.321375000000 |
| C          | 2.161303000000  | -1.132210000000 | -0.214421000000 |
| N          | -0.096971000000 | -2.188542000000 | -0.238222000000 |
| H          | -3.296487000000 | 3.277463000000  | 0.491704000000  |
| H          | -2.736236000000 | 1.549353000000  | -0.357321000000 |
| C          | 0.554776000000  | 3.651050000000  | 0.377212000000  |
| C          | -0.024405000000 | 2.405182000000  | 0.139896000000  |

|          |                 |                 |                 |
|----------|-----------------|-----------------|-----------------|
| C        | 2.815659000000  | 0.101331000000  | -0.115989000000 |
| C        | -2.094281000000 | -3.027325000000 | -0.301265000000 |
| N        | 2.153724000000  | 1.265232000000  | -0.011676000000 |
| C        | 0.777845000000  | -1.109731000000 | -0.156057000000 |
| C        | -0.245197000000 | 4.760235000000  | 0.624527000000  |
| C        | -1.435787000000 | 2.243904000000  | 0.136159000000  |
| C        | -1.172976000000 | -4.098994000000 | -0.193688000000 |
| C        | 4.295371000000  | 0.179319000000  | -0.150090000000 |
| C        | 0.080805000000  | -3.546351000000 | -0.135471000000 |
| C        | -1.626154000000 | 4.606325000000  | 0.667709000000  |
| C        | 0.831847000000  | 1.220032000000  | 0.011072000000  |
| C        | -2.215339000000 | 3.361287000000  | 0.436939000000  |
| C        | 6.299130000000  | 1.412073000000  | -0.712255000000 |
| C        | 5.088534000000  | -0.875068000000 | 0.317039000000  |
| Cl       | -2.063575000000 | -0.116285000000 | 2.167753000000  |
| C        | 7.083993000000  | 0.356003000000  | -0.251047000000 |
| C        | 6.476386000000  | -0.784935000000 | 0.269557000000  |
| H        | 0.863601000000  | -1.789877000000 | 3.504266000000  |
| H        | -0.306402000000 | -1.485305000000 | 2.561671000000  |
| H        | 0.207160000000  | 5.729781000000  | 0.803780000000  |
| H        | -2.262787000000 | 5.457515000000  | 0.888846000000  |
| H        | 4.293537000000  | 2.146652000000  | -1.008905000000 |
| H        | 6.768442000000  | 2.302585000000  | -1.117838000000 |
| H        | 8.166511000000  | 0.425064000000  | -0.292257000000 |
| H        | 7.082996000000  | -1.602388000000 | 0.645950000000  |
| H        | 4.626997000000  | -1.756625000000 | 0.752327000000  |
| H        | -1.407641000000 | -5.151175000000 | -0.138135000000 |
| C        | 4.912308000000  | 1.328710000000  | -0.656398000000 |
| H        | 1.637396000000  | 3.727098000000  | 0.385445000000  |
| Cl       | -4.154126000000 | 0.704058000000  | -0.468054000000 |
| C        | 1.398591000000  | -4.207838000000 | 0.069531000000  |
| H        | 1.888992000000  | -3.797048000000 | 0.957341000000  |
| H        | 1.232658000000  | -5.273660000000 | 0.231679000000  |
| H        | 2.055767000000  | -4.098731000000 | -0.798692000000 |
| C        | -3.582921000000 | -3.041888000000 | -0.361127000000 |
| H        | -3.932081000000 | -2.460087000000 | -1.217882000000 |
| H        | -3.954583000000 | -4.064356000000 | -0.444223000000 |
| H        | -3.994732000000 | -2.582170000000 | 0.542325000000  |
| H        | 2.711927000000  | -2.047362000000 | -0.357592000000 |
| <b>P</b> |                 |                 |                 |
| Rh       | -1.373681000000 | 0.898843000000  | -0.190692000000 |
| Cl       | -1.259646000000 | 1.163703000000  | -2.561996000000 |
| O        | -3.507558000000 | 1.089667000000  | -0.163702000000 |
| N        | 0.588469000000  | 0.827035000000  | -0.122639000000 |
| N        | -0.884195000000 | -1.295989000000 | -0.395841000000 |
| C        | 2.657058000000  | -0.270911000000 | -0.302806000000 |
| N        | 0.477172000000  | -1.461672000000 | -0.343345000000 |
| H        | -3.036037000000 | 3.654777000000  | 0.100526000000  |
| C        | 0.770598000000  | 4.462863000000  | 0.278273000000  |
| C        | 0.326022000000  | 3.147226000000  | 0.115123000000  |
| C        | 3.263256000000  | 0.984289000000  | -0.164170000000 |
| C        | -1.414058000000 | -2.498887000000 | -0.355690000000 |
| N        | 2.555748000000  | 2.111945000000  | -0.017886000000 |

|    |                 |                 |                 |
|----|-----------------|-----------------|-----------------|
| C  | 1.270019000000  | -0.312640000000 | -0.255996000000 |
| C  | -0.164931000000 | 5.482255000000  | 0.383893000000  |
| C  | -1.049453000000 | 2.835636000000  | 0.056545000000  |
| C  | -0.391501000000 | -3.476865000000 | -0.281915000000 |
| C  | 4.739246000000  | 1.122182000000  | -0.203483000000 |
| C  | 0.799698000000  | -2.800347000000 | -0.266289000000 |
| C  | -1.529477000000 | 5.181287000000  | 0.319955000000  |
| C  | 1.233601000000  | 2.013275000000  | -0.010595000000 |
| C  | -1.974186000000 | 3.869688000000  | 0.155684000000  |
| C  | 6.684931000000  | 2.457391000000  | -0.736085000000 |
| C  | 5.580613000000  | 0.083747000000  | 0.212079000000  |
| Cl | -1.614353000000 | 0.550472000000  | 2.121546000000  |
| C  | 7.517638000000  | 1.416593000000  | -0.327097000000 |
| C  | 6.962978000000  | 0.231875000000  | 0.153418000000  |
| H  | -3.984670000000 | 0.602873000000  | -0.857155000000 |
| H  | -3.775368000000 | 0.757887000000  | 0.705208000000  |
| H  | 0.160019000000  | 6.509297000000  | 0.514787000000  |
| H  | -2.258124000000 | 5.983537000000  | 0.398286000000  |
| H  | 4.646319000000  | 3.120583000000  | -0.978364000000 |
| H  | 7.113268000000  | 3.381868000000  | -1.109881000000 |
| H  | 8.595873000000  | 1.531082000000  | -0.377842000000 |
| H  | 7.607134000000  | -0.574025000000 | 0.490383000000  |
| H  | 5.161107000000  | -0.832946000000 | 0.616517000000  |
| H  | -0.517238000000 | -4.548306000000 | -0.233180000000 |
| C  | 5.303392000000  | 2.315423000000  | -0.668232000000 |
| H  | 1.836393000000  | 4.664811000000  | 0.324575000000  |
| Cl | -4.216242000000 | -0.220001000000 | -2.986298000000 |
| C  | 2.177315000000  | -3.365052000000 | -0.162967000000 |
| H  | 2.715520000000  | -2.965928000000 | 0.701888000000  |
| H  | 2.094581000000  | -4.445517000000 | -0.036548000000 |
| H  | 2.766667000000  | -3.178585000000 | -1.065994000000 |
| C  | -2.893993000000 | -2.684716000000 | -0.353243000000 |
| H  | -3.345372000000 | -2.208188000000 | -1.227478000000 |
| H  | -3.147190000000 | -3.746406000000 | -0.363642000000 |
| H  | -3.320999000000 | -2.233869000000 | 0.548041000000  |
| H  | 3.251017000000  | -1.150285000000 | -0.485371000000 |
| H  | -2.981636000000 | 0.322857000000  | -2.953666000000 |

Table S6. Optimized geometry of the **S<sub>0</sub> state** of the **[RhL<sup>2-5</sup>(H<sub>2</sub>O)Cl<sub>2</sub>]** complex (geometry **a** in Figure 7) in Cartesian (XYZ) coordinates as calculated in Gaussian at the B3LYP/Stuttgart RSC 1997/6-31+g(d) level of theory **in the gas phase**.

|    |                 |                 |                 |
|----|-----------------|-----------------|-----------------|
| Rh | 1.583789000000  | 0.710307000000  | 0.174608000000  |
| Cl | 1.725807000000  | 1.189853000000  | -2.163735000000 |
| O  | 3.132131000000  | 2.106507000000  | 0.666659000000  |
| N  | 0.232589000000  | -0.680783000000 | -0.182187000000 |
| N  | -0.414711000000 | 1.837142000000  | 0.232124000000  |
| C  | -2.002833000000 | -1.438872000000 | -0.135702000000 |
| N  | -1.354370000000 | 0.975579000000  | -0.289059000000 |
| H  | 4.756674000000  | 0.104599000000  | 0.136611000000  |
| C  | 2.836045000000  | -3.251607000000 | -0.339530000000 |
| C  | 2.140649000000  | -2.047014000000 | -0.201733000000 |
| C  | -1.444773000000 | -2.721986000000 | -0.229701000000 |

|    |                 |                 |                 |
|----|-----------------|-----------------|-----------------|
| C  | -0.835060000000 | 3.056596000000  | -0.052028000000 |
| N  | -0.142996000000 | -2.990561000000 | -0.317180000000 |
| C  | -1.075223000000 | -0.394739000000 | -0.213566000000 |
| C  | 4.226038000000  | -3.239036000000 | -0.310182000000 |
| C  | 2.822706000000  | -0.823163000000 | -0.027529000000 |
| C  | -2.035122000000 | 2.999622000000  | -0.798390000000 |
| C  | -2.334855000000 | 1.670792000000  | -0.966233000000 |
| C  | 4.907375000000  | -2.029539000000 | -0.141572000000 |
| C  | 0.681637000000  | -1.951634000000 | -0.236575000000 |
| C  | 4.213462000000  | -0.825074000000 | 0.000883000000  |
| Cl | 1.459456000000  | 0.293179000000  | 2.497140000000  |
| H  | 3.146151000000  | 2.947091000000  | 0.182463000000  |
| H  | 3.096378000000  | 2.311901000000  | 1.610627000000  |
| H  | 4.781354000000  | -4.164605000000 | -0.420335000000 |
| H  | 5.993361000000  | -2.025024000000 | -0.119978000000 |
| H  | -2.592920000000 | 3.831023000000  | -1.202758000000 |
| H  | 2.286225000000  | -4.178439000000 | -0.472141000000 |
| C  | -3.422699000000 | 1.069907000000  | -1.790406000000 |
| H  | -4.304171000000 | 0.831967000000  | -1.190560000000 |
| H  | -3.711526000000 | 1.797135000000  | -2.550668000000 |
| H  | -3.092823000000 | 0.157868000000  | -2.292526000000 |
| C  | -0.059160000000 | 4.256308000000  | 0.371645000000  |
| H  | 0.378295000000  | 4.753031000000  | -0.499000000000 |
| H  | -0.710593000000 | 4.974051000000  | 0.876291000000  |
| H  | 0.744643000000  | 3.970114000000  | 1.052635000000  |
| H  | -2.108610000000 | -3.581928000000 | -0.198795000000 |
| C  | -3.442498000000 | -1.269238000000 | 0.167567000000  |
| C  | -3.833064000000 | -0.424164000000 | 1.213531000000  |
| C  | -4.414868000000 | -1.976250000000 | -0.546321000000 |
| C  | -5.180942000000 | -0.270831000000 | 1.522838000000  |
| C  | -5.763055000000 | -1.824412000000 | -0.230979000000 |
| C  | -6.149069000000 | -0.967755000000 | 0.799249000000  |
| H  | -3.083092000000 | 0.116219000000  | 1.783838000000  |
| H  | -4.120787000000 | -2.624242000000 | -1.366887000000 |
| H  | -5.475073000000 | 0.390838000000  | 2.331004000000  |
| H  | -6.511980000000 | -2.369855000000 | -0.795860000000 |
| H  | -7.200274000000 | -0.846276000000 | 1.040057000000  |

Table S7. Optimized **geometry in the vicinity of  $S_0/T_1$  crossing point** of the **[RhL<sup>2.5</sup>(H<sub>2</sub>O)Cl<sub>2</sub>]** complex in Cartesian (XYZ) coordinates as calculated in Gaussian at the B3LYP/Stuttgart RSC 1997/6-31+g(d) level of theory **in the gas phase**.

|    |                 |                 |                 |
|----|-----------------|-----------------|-----------------|
| Rh | -1.573050000000 | -0.531387000000 | 0.095614000000  |
| Cl | -2.562480000000 | -1.768735000000 | -1.657301000000 |
| O  | -4.929790000000 | -1.821266000000 | 0.706456000000  |
| N  | 0.006091000000  | 0.796007000000  | -0.314132000000 |
| N  | 0.535174000000  | -1.777016000000 | 0.119792000000  |
| C  | 2.291470000000  | 1.436258000000  | -0.119931000000 |
| N  | 1.518381000000  | -0.939697000000 | -0.379850000000 |
| H  | -4.622531000000 | 0.404061000000  | 0.234556000000  |
| C  | -2.416790000000 | 3.564175000000  | -0.401263000000 |
| C  | -1.822181000000 | 2.295444000000  | -0.278819000000 |
| C  | 1.805595000000  | 2.753964000000  | -0.241166000000 |
| C  | 0.904050000000  | -3.007626000000 | -0.203210000000 |

|    |                 |                 |                 |
|----|-----------------|-----------------|-----------------|
| N  | 0.518860000000  | 3.095617000000  | -0.371068000000 |
| C  | 1.301767000000  | 0.445598000000  | -0.273118000000 |
| C  | -3.802212000000 | 3.682987000000  | -0.323794000000 |
| C  | -2.627387000000 | 1.141523000000  | -0.072731000000 |
| C  | 2.111208000000  | -2.984194000000 | -0.950752000000 |
| C  | 2.477046000000  | -1.661934000000 | -1.076220000000 |
| C  | -4.590023000000 | 2.546402000000  | -0.102127000000 |
| C  | -0.375008000000 | 2.098684000000  | -0.327709000000 |
| C  | -4.011395000000 | 1.276876000000  | 0.031508000000  |
| Cl | -1.925693000000 | -0.769671000000 | 2.385067000000  |
| H  | -4.600337000000 | -2.205704000000 | -0.105668000000 |
| H  | -4.561500000000 | -2.363459000000 | 1.421527000000  |
| H  | -4.270007000000 | 4.658198000000  | -0.424279000000 |
| H  | -5.670059000000 | 2.645181000000  | -0.021588000000 |
| H  | 2.631712000000  | -3.826881000000 | -1.384852000000 |
| H  | -1.783914000000 | 4.432219000000  | -0.551247000000 |
| C  | 3.602292000000  | -1.083336000000 | -1.871180000000 |
| H  | 4.517366000000  | -0.989572000000 | -1.281253000000 |
| H  | 3.808312000000  | -1.745532000000 | -2.713795000000 |
| H  | 3.358686000000  | -0.096790000000 | -2.268596000000 |
| C  | 0.078379000000  | -4.189138000000 | 0.194328000000  |
| H  | -0.315687000000 | -4.689600000000 | -0.687988000000 |
| H  | 0.680899000000  | -4.904316000000 | 0.754247000000  |
| H  | -0.754117000000 | -3.866023000000 | 0.810590000000  |
| H  | 2.511710000000  | 3.580352000000  | -0.193577000000 |
| C  | 3.697462000000  | 1.144536000000  | 0.265643000000  |
| C  | 3.937765000000  | 0.302153000000  | 1.368275000000  |
| C  | 4.793748000000  | 1.673096000000  | -0.438102000000 |
| C  | 5.241309000000  | -0.042832000000 | 1.726247000000  |
| C  | 6.099215000000  | 1.320025000000  | -0.082571000000 |
| C  | 6.326262000000  | 0.450537000000  | 0.991165000000  |
| H  | 3.098186000000  | -0.083256000000 | 1.942381000000  |
| H  | 4.626269000000  | 2.319852000000  | -1.297358000000 |
| H  | 5.406178000000  | -0.700571000000 | 2.576551000000  |
| H  | 6.938218000000  | 1.704755000000  | -0.658306000000 |
| H  | 7.340121000000  | 0.158952000000  | 1.252325000000  |

Table S8. Optimized geometry of the **T<sub>1</sub> state** of the **[RhL<sup>2+5</sup>(H<sub>2</sub>O)Cl<sub>2</sub>]** complex (geometry **b** in Figure 7) in Cartesian (XYZ) coordinates as calculated in Gaussian at the B3LYP/Stuttgart RSC 1997/6-31+g(d) level of theory **in the gas phase**.

|    |                 |                 |                 |
|----|-----------------|-----------------|-----------------|
| Rh | -1.278022000000 | 0.797515000000  | 0.108586000000  |
| Cl | -2.763053000000 | 0.585874000000  | -1.722797000000 |
| O  | -5.098114000000 | 2.227061000000  | 0.311645000000  |
| N  | 0.768000000000  | 0.793097000000  | -0.204985000000 |
| N  | -0.559439000000 | -1.447423000000 | 0.203868000000  |
| C  | 2.905895000000  | -0.230478000000 | -0.034692000000 |
| N  | 0.744855000000  | -1.507231000000 | -0.268800000000 |
| H  | -3.021670000000 | 3.523839000000  | 0.041274000000  |
| C  | 0.756799000000  | 4.470040000000  | -0.288994000000 |
| C  | 0.369812000000  | 3.121467000000  | -0.193826000000 |
| C  | 3.399213000000  | 1.091896000000  | -0.121451000000 |
| C  | -1.122845000000 | -2.606444000000 | -0.109535000000 |

|    |                 |                 |                 |
|----|-----------------|-----------------|-----------------|
| N  | 2.662791000000  | 2.194969000000  | -0.236841000000 |
| C  | 1.508955000000  | -0.328911000000 | -0.174365000000 |
| C  | -0.217715000000 | 5.462886000000  | -0.271630000000 |
| C  | -1.002969000000 | 2.765256000000  | -0.068961000000 |
| C  | -0.202333000000 | -3.421054000000 | -0.821799000000 |
| C  | 0.966140000000  | -2.702929000000 | -0.939590000000 |
| C  | -1.570285000000 | 5.110220000000  | -0.156078000000 |
| C  | 1.333485000000  | 2.029957000000  | -0.214123000000 |
| C  | -1.968420000000 | 3.770699000000  | -0.052666000000 |
| Cl | -2.415700000000 | 0.920913000000  | 2.157656000000  |
| H  | -4.740916000000 | 1.743369000000  | -0.448175000000 |
| H  | -4.608145000000 | 1.868334000000  | 1.066693000000  |
| H  | 0.068475000000  | 6.507461000000  | -0.347964000000 |
| H  | -2.329735000000 | 5.887725000000  | -0.143889000000 |
| H  | -0.386362000000 | -4.401481000000 | -1.237440000000 |
| H  | 1.811226000000  | 4.713763000000  | -0.376919000000 |
| C  | 2.194360000000  | -3.057090000000 | -1.714681000000 |
| H  | 2.992350000000  | -3.448501000000 | -1.078828000000 |
| H  | 1.930214000000  | -3.826656000000 | -2.443785000000 |
| H  | 2.591955000000  | -2.196572000000 | -2.260187000000 |
| C  | -2.547440000000 | -2.887262000000 | 0.243296000000  |
| H  | -3.177689000000 | -2.819648000000 | -0.650552000000 |
| H  | -2.652907000000 | -3.894438000000 | 0.658165000000  |
| H  | -2.911058000000 | -2.158412000000 | 0.970272000000  |
| H  | 4.474051000000  | 1.245807000000  | -0.051307000000 |
| C  | 3.832619000000  | -1.333338000000 | 0.321528000000  |
| C  | 3.524214000000  | -2.205241000000 | 1.381152000000  |
| C  | 5.068086000000  | -1.473304000000 | -0.333353000000 |
| C  | 4.424316000000  | -3.201067000000 | 1.762852000000  |
| C  | 5.968016000000  | -2.469100000000 | 0.052151000000  |
| C  | 5.647959000000  | -3.338074000000 | 1.099214000000  |
| H  | 2.584596000000  | -2.095546000000 | 1.914807000000  |
| H  | 5.317499000000  | -0.814833000000 | -1.160985000000 |
| H  | 4.173193000000  | -3.863598000000 | 2.585901000000  |
| H  | 6.915786000000  | -2.568008000000 | -0.468840000000 |
| H  | 6.347438000000  | -4.112699000000 | 1.398883000000  |

Table S9. Optimized geometry of the **S<sub>4</sub>** state of the **[RhL<sup>2.5</sup>(H<sub>2</sub>O)Cl<sub>2</sub>]** complex (geometry **c** in Figure X) in Cartesian (XYZ) coordinates as calculated in Gaussian at the B3LYP/Stuttgart RSC 1997/6-31+g(d) level of theory **in the gas phase**.

|    |                 |                 |                 |
|----|-----------------|-----------------|-----------------|
| Rh | 1.619454000000  | 0.664115000000  | 0.174130000000  |
| Cl | 1.774826000000  | 1.121102000000  | -2.090748000000 |
| O  | 3.290505000000  | 2.107019000000  | 0.448689000000  |
| N  | 0.191076000000  | -0.720125000000 | -0.029915000000 |
| N  | -0.355190000000 | 1.865404000000  | 0.284507000000  |
| C  | -2.094983000000 | -1.394552000000 | -0.112294000000 |
| N  | -1.333231000000 | 1.029047000000  | -0.251905000000 |
| H  | 4.784183000000  | -0.111507000000 | 0.104739000000  |
| C  | 2.697946000000  | -3.383927000000 | -0.282628000000 |
| C  | 2.053857000000  | -2.147740000000 | -0.154192000000 |
| C  | -1.577884000000 | -2.690351000000 | -0.183448000000 |
| C  | -0.738021000000 | 3.117692000000  | -0.008403000000 |
| N  | -0.255622000000 | -3.018738000000 | -0.280287000000 |

|    |                 |                 |                 |
|----|-----------------|-----------------|-----------------|
| C  | -1.137635000000 | -0.345552000000 | -0.145199000000 |
| C  | 4.094153000000  | -3.436742000000 | -0.275553000000 |
| C  | 2.806304000000  | -0.959138000000 | -0.011806000000 |
| C  | -1.941594000000 | 3.106783000000  | -0.728715000000 |
| C  | -2.290742000000 | 1.773911000000  | -0.917428000000 |
| C  | 4.836478000000  | -2.259851000000 | -0.138130000000 |
| C  | 0.589619000000  | -2.001090000000 | -0.166338000000 |
| C  | 4.195432000000  | -1.017106000000 | -0.003878000000 |
| Cl | 1.669467000000  | 0.516278000000  | 2.514320000000  |
| H  | 3.242966000000  | 2.827766000000  | -0.196256000000 |
| H  | 3.242431000000  | 2.490482000000  | 1.337754000000  |
| H  | 4.601415000000  | -4.391697000000 | -0.376021000000 |
| H  | 5.922782000000  | -2.302717000000 | -0.133633000000 |
| H  | -2.481191000000 | 3.961376000000  | -1.111720000000 |
| H  | 2.096189000000  | -4.281956000000 | -0.384645000000 |
| C  | -3.364908000000 | 1.217012000000  | -1.793898000000 |
| H  | -4.273166000000 | 0.948144000000  | -1.247989000000 |
| H  | -3.628557000000 | 1.972717000000  | -2.539186000000 |
| H  | -3.020215000000 | 0.323263000000  | -2.323645000000 |
| C  | 0.102305000000  | 4.290109000000  | 0.393930000000  |
| H  | 0.944645000000  | 4.431509000000  | -0.295933000000 |
| H  | -0.489457000000 | 5.208837000000  | 0.377850000000  |
| H  | 0.502149000000  | 4.159340000000  | 1.404013000000  |
| H  | -2.263161000000 | -3.529836000000 | -0.110590000000 |
| C  | -3.542394000000 | -1.212531000000 | 0.159702000000  |
| C  | -3.972792000000 | -0.356285000000 | 1.190150000000  |
| C  | -4.508373000000 | -1.942910000000 | -0.554535000000 |
| C  | -5.329840000000 | -0.230743000000 | 1.489755000000  |
| C  | -5.865716000000 | -1.818805000000 | -0.251071000000 |
| C  | -6.282991000000 | -0.959148000000 | 0.769623000000  |
| H  | -3.238983000000 | 0.201406000000  | 1.764589000000  |
| H  | -4.193323000000 | -2.595800000000 | -1.363653000000 |
| H  | -5.642886000000 | 0.431380000000  | 2.292174000000  |
| H  | -6.597308000000 | -2.387988000000 | -0.817740000000 |
| H  | -7.338974000000 | -0.859166000000 | 1.003305000000  |

## Cytotoxic activity

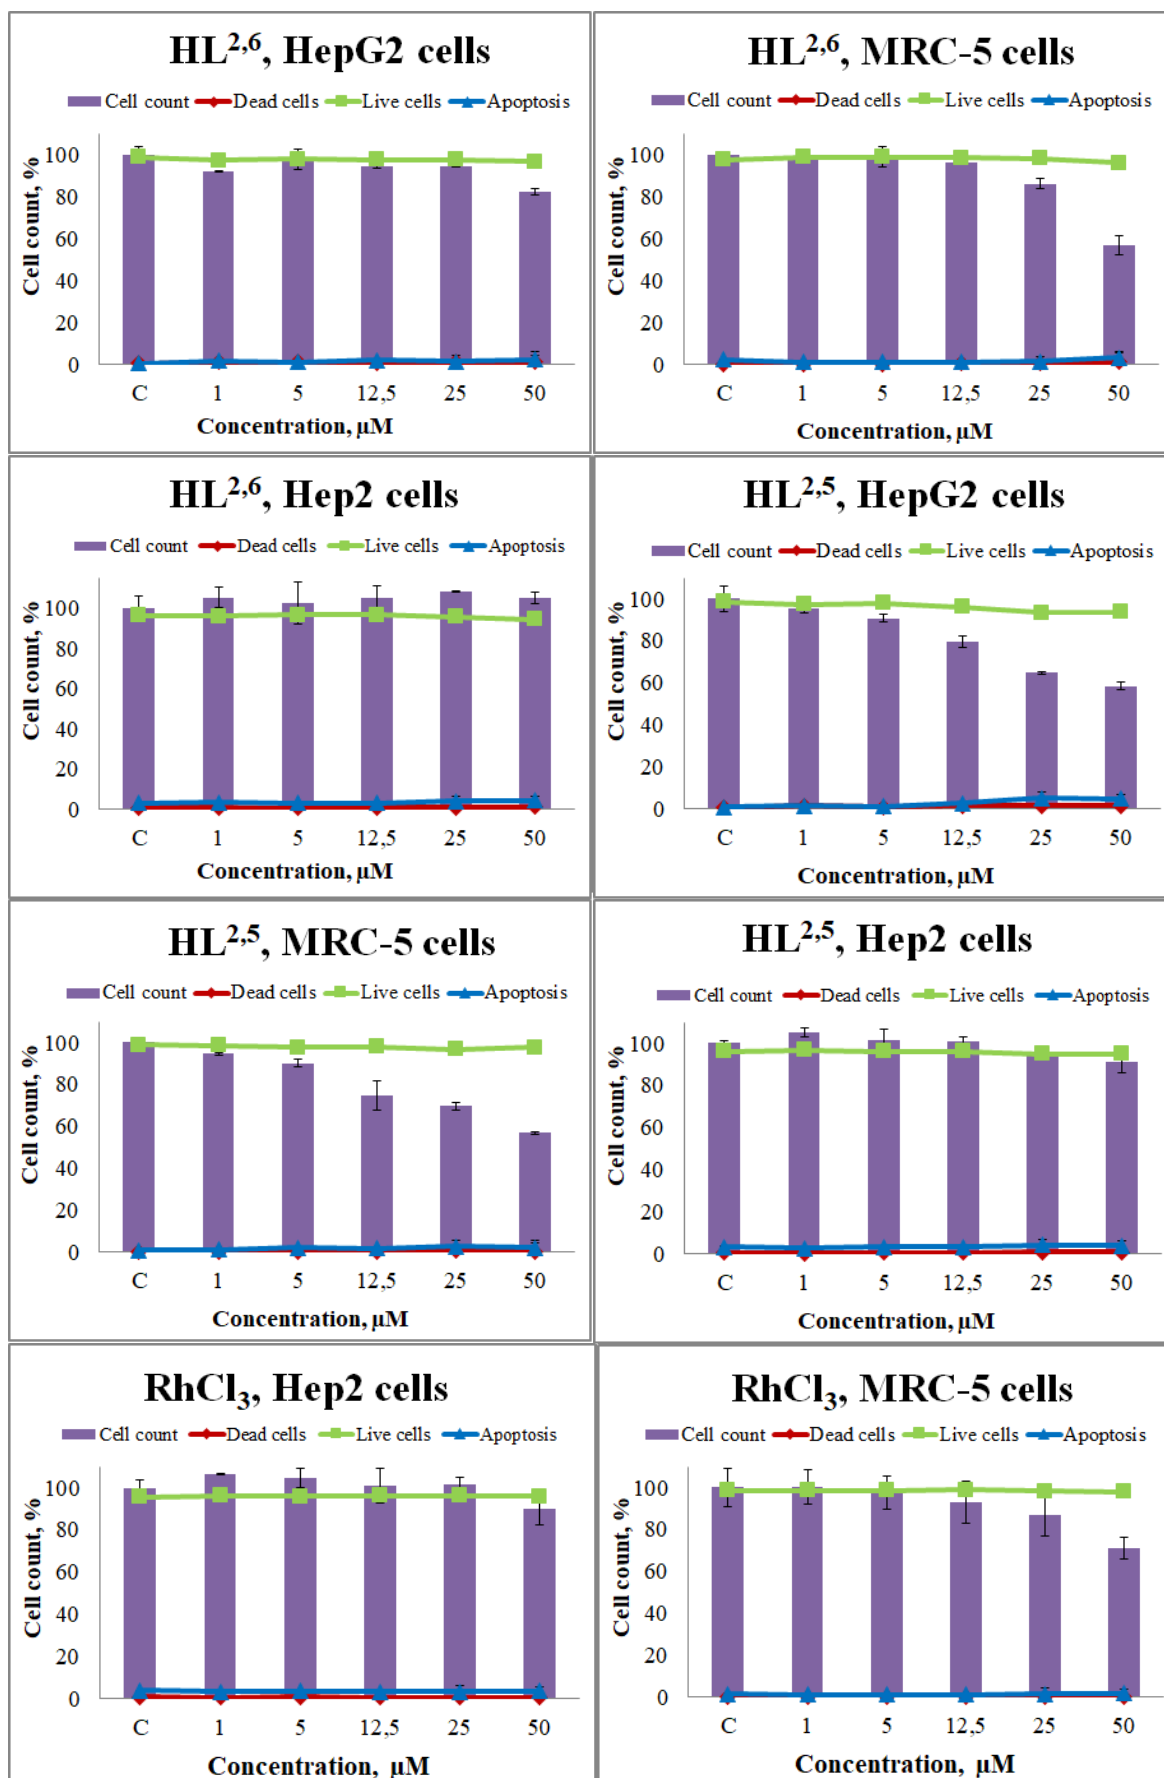

Figure S29. Effect of HL<sup>2,6</sup>, HL<sup>2,5</sup> and RhCl<sub>3</sub> on the viability of Hep2, HepG2 and MRC-5 cells determined by dual staining with Hoechst 33342/propidium iodide.
